# Supplementary material for: Altered brain microRNA biogenesis contributes to phenotypic deficits in a 22q11-deletion mouse model
Source: Springer Nature journal article supplement (doi:10.1038/ng.138), 2008-05-11
Supplement: 41588_2008_BFng138_MOESM6_ESM.pdf [file 41588_2008_BFng138_MOESM6_ESM.pdf]

**SUPPLEMENTARY INFORMATION FOR**

**Altered brain microRNA biogenesis in mice deficient for the 22q11 region  
contributes to behavioral and neuronal deficits**

Kimberly L. Stark, Bin Xu, Anindya Bagchi, Wen-Sung Lai, Hui Liu, Ruby Hsu, Xiang  
Wan, Paul Pavlidis, Alea A. Mills, Maria Karayiorgou, Joseph A. Gogos

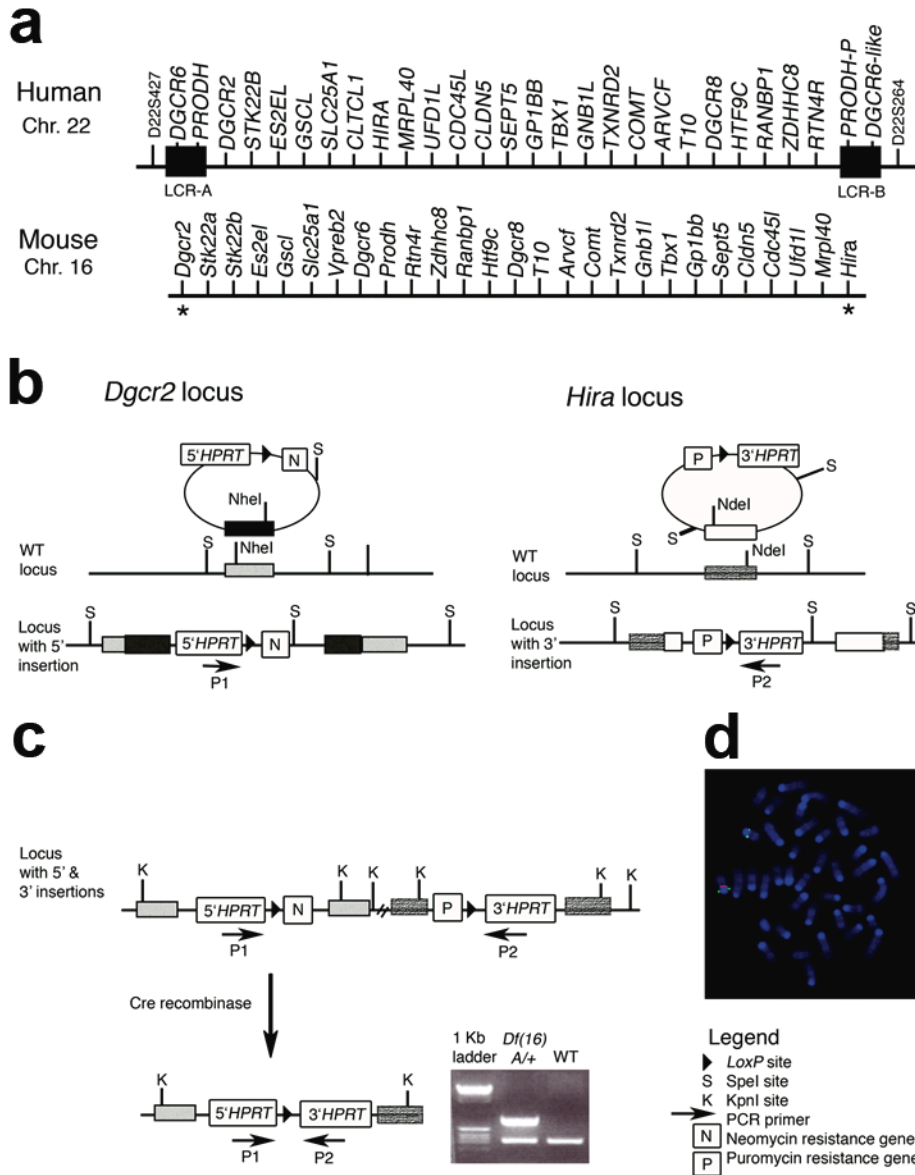

**Supplementary Figure 1: Generation of *Df(16)A*<sup>+/-</sup> mice.**

(A) Schematic diagram showing the human chromosome 22q11.2 region, located between microsatellite markers D22S427 and D22S264, and the syntenic mouse region. Almost all of the functional human genes in this segment are represented in the mouse, organized in a slightly different order<sup>1</sup>. The 1.5-Mb deletion is mediated by low copy repeat sequences LCR-A and LCR-B (illustrated as black boxes). *PRODH-P* and *DGCR6-like* indicate pseudogenes. *Dgcr2* and *Hira*, the two endpoints of the targeted deletion, are indicated by asterisks.

(B) WT *Dgcr2* and *Hira* loci and the corresponding targeted loci following introduction of a 5'HPRT mini-cassette and a 3'HPRT mini-cassette, respectively.

(C) Cre-induced recombination between *loxP* sites *in cis* leads to the generation of a functional *HPRT* minigene and a 1.3-Mb deficiency in mice. Due to the recombination of the *loxP* sites, a diagnostic 829-bp PCR product can be detected in *Df(16)A<sup>+/-</sup>* mice.

(D) FISH analysis of *Df(16)A<sup>+/-</sup>* mice. Metaphase preparations from splenocyte cultures demonstrate a HET deletion on mouse chromosome 16. BAC probe RP23-356A24 (green) is located outside the deleted region and BAC probe RP23-55L18 (red) lies within the deleted region. Diagrams are not drawn to scale.

1. Puech, A. et al. Comparative mapping of the human 22q11 chromosomal region and the orthologous region in mice reveals complex changes in gene organization. *Proceedings of the National Academy of Sciences of the United States of America* **94**, 14608-13 (1997).

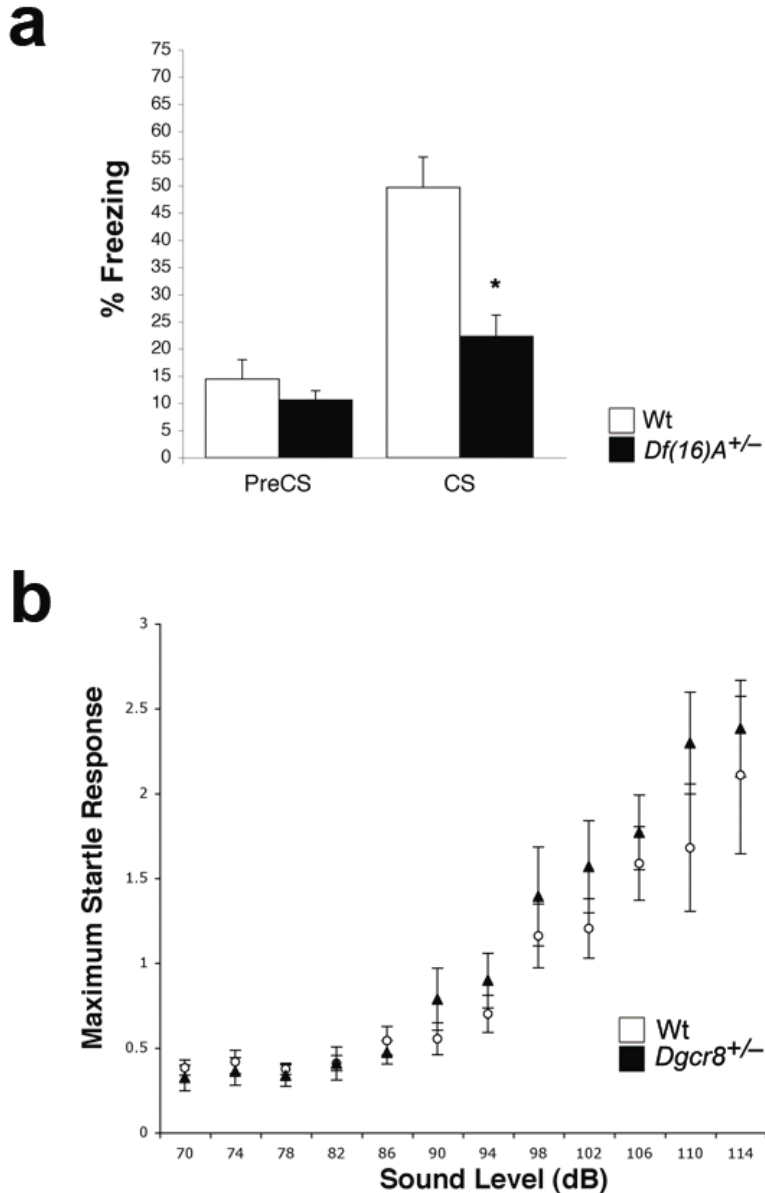

**Supplementary Figure 2. Follow-up behavioral analysis.**

(A) An additional cohort of *Df(16)A*<sup>+/-</sup> mice displays deficits in cued fear conditioning: 10 *Df(16)A*<sup>+/-</sup> male mice and 10 WT littermate control male mice were exposed to 2 tone-footshock pairings in a conditioning chamber, and then were returned to their home cages. 48 h later, mice were exposed to a novel chamber (PreCS), and no significant differences in % freezing time were found ( $P > 0.05$ ). When presented with the tone (CS), however, *Df(16)A*<sup>+/-</sup> mice were found to freeze significantly less than WT mice ( $P < 0.05$ ). PreCS: preconditioned stimulus. CS: conditioned stimulus. \* $P < 0.05$ . Data are shown as mean  $\pm$  S.E.M.

(B) *Dgcr8*<sup>+/-</sup> mice display normal hearing: Startle response curve session for the *Dgcr8*<sup>+/-</sup> mice included recordings made every 4 dBs above background (70 dB), up to 114 dBs.

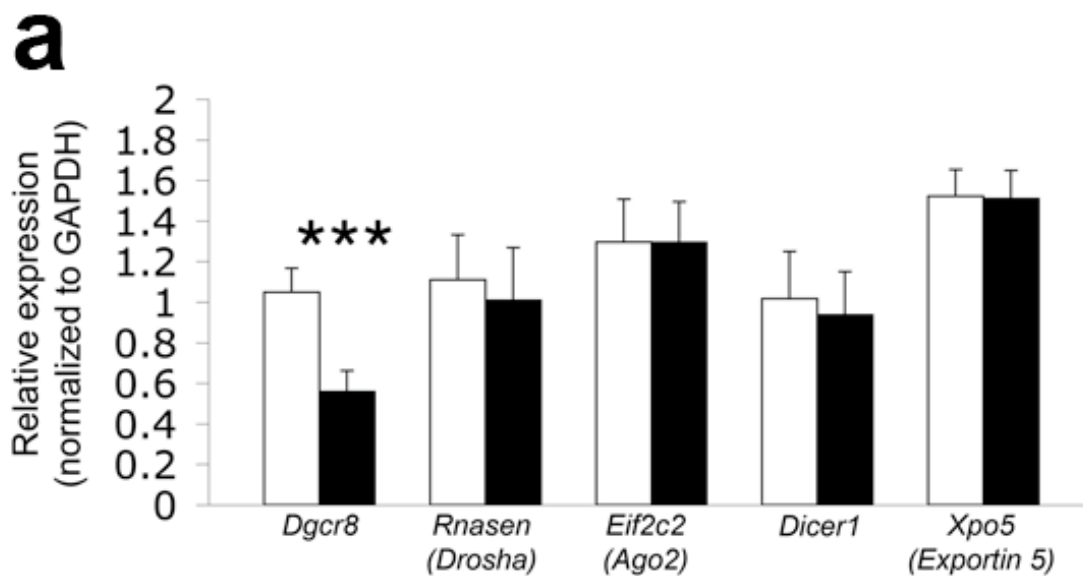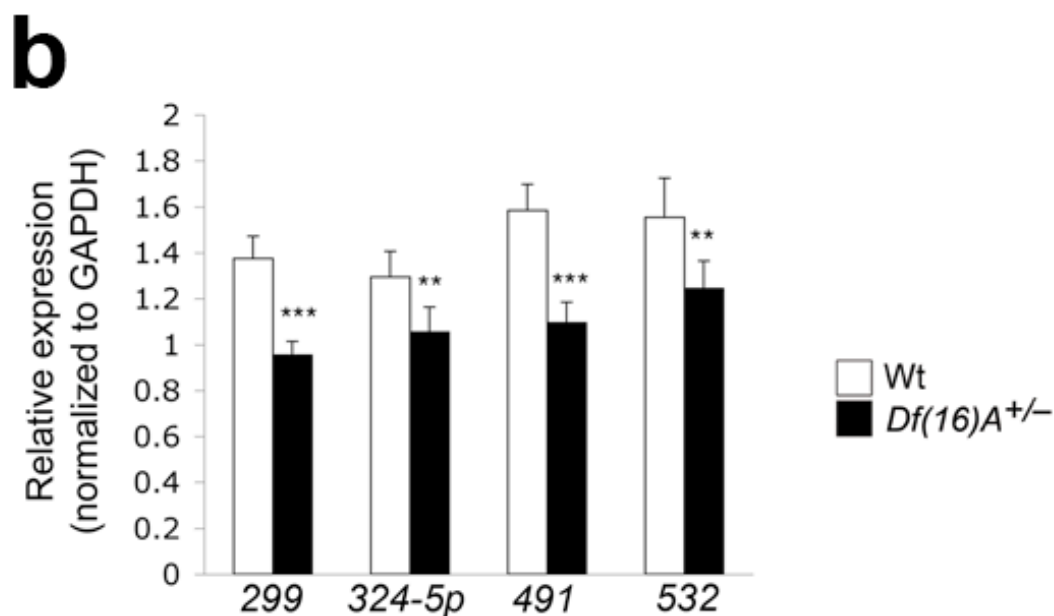

**Supplementary Figure 3. Follow-up expression analysis.**

(A) Expression analysis of 5 genes [*Dgcr8*, *Rnasen (Drosha)*, *Eif2c2 (Ago2)*, *Dicer1* and *Xpo5 (Exportin5)*] in the miRNA bioprocessing pathway, at the PFC of *Df(16)A*<sup>+/-</sup> mice. \*\*\**P* < 0.001. Data are shown as mean ± S.E.M.

(B) Expression of mature forms of *mir-299*, *mir-324-5p*, *mir-491* and *mir-532* in the PFC of *Df(16)A*<sup>+/-</sup> mice and WT littermate controls, as assayed by qRT-PCR. Data are shown as mean ± S.E.M. \*\**P* < 0.01, \*\*\**P* < 0.001.

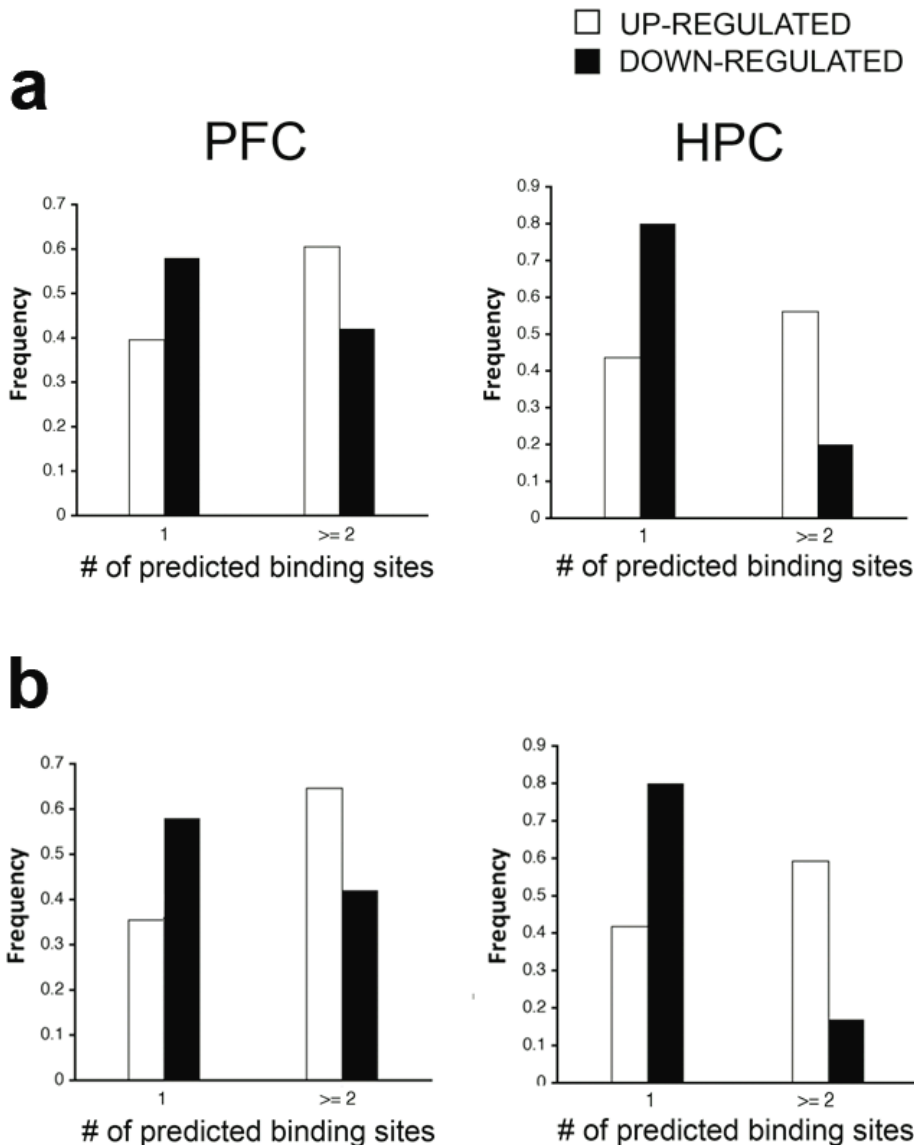

**Supplementary Figure 4. Frequency distribution of the miRNA seed sites.**

Frequency distribution of the miRNA seed sites at the 3'-UTR of significantly up-regulated and down-regulated transcripts, at the PFC and HPC of *Df(16)A<sup>+/-</sup>* mice. Note that relative enrichment is exclusively confined in up-regulated PFC and HPC transcripts containing multiple ( $\geq 2$ ) seed sites. Analysis included GeneChip transcripts annotated in the TargetScan<sup>1</sup> (A) or PicTar<sup>2</sup> (B) database, which are differentially expressed in the PFC ( $n = 710$ , FDR  $P$ -value  $< 0.05$ ; 210 up-regulated and 500 down-regulated) or HPC ( $n = 398$ , FDR  $P$ -value  $< 0.05$ ; 325 up-regulated and 73 down-regulated).

1. Lewis, B.P., Shih, I.H., Jones-Rhoades, M.W., Bartel, D.P. & Burge, C.B. Prediction of mammalian microRNA targets. *Cell* **115**, 787-98 (2003).
2. Krek, A. et al. Combinatorial microRNA target predictions. *Nature Genetics* **37**, 495-500 (2005).

**Supplementary Table 1. List of differentially expressed probe sets in the PFC and HPC of *Df(16)A<sup>+/-</sup>* mice (FDR *P*-value < 0.01).**

| Probe_ID     | FDR <i>P</i> -value | Rank | Regulation | Gene Symbol   | Chr   |
|--------------|---------------------|------|------------|---------------|-------|
| <b>PFC</b>   |                     |      |            |               |       |
| 1448900_at   | 1.5E-13             | 0    | down       | D16H22S680E   | chr16 |
| 1452434_s_at | 9.6E-12             | 2    | down       | Dgcr6         | chr16 |
| 1421810_at   | 9.6E-12             | 1    | down       | Dgcr2         | chr16 |
| 1422547_at   | 3.2E-11             | 3    | down       | Ranbp1        | chr16 |
| 1449183_at   | 4.8E-11             | 5    | down       | Comt          | chr16 |
| 1448849_at   | 4.8E-11             | 4    | down       | Mrpl40        | chr16 |
| 1428190_at   | 4.8E-11             | 6    | down       | Slc25a1       | chr16 |
| 1419732_at   | 1.2E-10             | 7    | down       | Rtn4r         | chr16 |
| 1418087_at   | 3.0E-10             | 8    | down       | Ufd1l         | chr16 |
| 1452357_at   | 6.5E-10             | 9    | down       | Gp1bb///Sept5 | chr16 |
| 1436468_at   | 1.4E-09             | 10   | down       | Zdhhc8        | chr16 |
| 1422977_at   | 5.5E-09             | 11   | down       | Gp1bb         | chr16 |
| 1432367_a_at | 2.4E-08             | 12   | down       | Ufd1l         | chr16 |
| 1434730_at   | 2.1E-07             | 13   | up         | Al854517      | chr7  |
| 1418701_at   | 2.1E-07             | 14   | down       | Comt          | chr16 |
| 1460033_at   | 2.2E-07             | 16   | up         | C030002C11Rik | chr1  |
| 1440357_at   | 2.2E-07             | 17   | up         |               | chr15 |
| 1435439_at   | 2.2E-07             | 18   | down       | Dgcr8         | chr16 |
| 1416822_at   | 2.2E-07             | 15   | down       | Es2el         | chr16 |
| 1428753_a_at | 3.5E-07             | 19   | down       | Dgcr6         | chr16 |
| 1428562_at   | 3.6E-07             | 20   | up         | 2210403K04Rik | chr11 |
| 1457030_at   | 3.6E-07             | 21   | up         | Mirg          | chr12 |
| 1441391_at   | 1.5E-06             | 22   | down       | Gnb1l         | chr16 |
| 1435179_at   | 2.4E-06             | 23   | up         | C130071C03Rik | chr13 |
| 1448115_at   | 5.7E-06             | 24   | down       | Htf9c         | chr16 |
| 1417629_at   | 1.0E-05             | 25   | down       | Prodh         | chr16 |
| 1435089_at   | 1.4E-05             | 26   | up         | 2010111I01Rik | chr13 |
| 1436241_s_at | 1.7E-05             | 27   | down       | Hira          | chr16 |
| 1455326_at   | 1.7E-05             | 29   | up         | 4932416N17Rik | chr16 |
| 1424038_a_at | 1.7E-05             | 28   | up         | 2310044H10Rik | chr7  |
| 1431126_a_at | 1.9E-05             | 30   | down       | 0610011F06Rik | chr17 |
| 1416821_at   | 1.9E-05             | 31   | down       | Es2el         | chr16 |
| 1448114_a_at | 2.4E-05             | 33   | down       | Htf9c         | chr16 |
| 1429972_s_at | 2.4E-05             | 35   | down       | Txnrd2        | chr16 |
| 1421809_at   | 2.4E-05             | 34   | down       | Dgcr2         | chr16 |
| 1417839_at   | 2.4E-05             | 32   | down       | Cldn5         | chr16 |
| 1416090_at   | 2.5E-05             | 36   | down       | Pdhb          | chr1  |
| 1416485_at   | 2.8E-05             | 37   | down       | Timm23        | chr10 |
| 1451000_at   | 3.2E-05             | 38   | down       | 1810020E01Rik | chr7  |
| 1449097_at   | 3.4E-05             | 39   | down       | Txnrd2        | chr16 |
| 1431665_a_at | 3.6E-05             | 40   | down       | Timm8b        | chr9  |
| 1450855_at   | 4.6E-05             | 41   | down       | Arvcf         | chr16 |
| 1417052_at   | 5.7E-05             | 42   | down       | Psmb3         | chr11 |

|              |         |    |      |               |       |
|--------------|---------|----|------|---------------|-------|
| 1416910_at   | 6.1E-05 | 43 | down | Dnajc15       | chr14 |
| 1439541_at   | 6.2E-05 | 44 | down | 4930414L22Rik | chr6  |
| 1457675_at   | 7.0E-05 | 45 | down | 2510002D24Rik | chr16 |
| 1416810_at   | 7.2E-05 | 46 | down | Mea1          | chr17 |
| 1415744_at   | 7.2E-05 | 47 | down | H2-Ke2        | chr17 |
| 1439305_at   | 7.3E-05 | 48 | up   |               | chrX  |
| 1423211_at   | 8.0E-05 | 49 | down | Nola3         | chr2  |
| 1452591_a_at | 1.0E-04 | 50 | down | 2410018G20Rik | chr16 |
| 1431614_at   | 1.1E-04 | 51 | up   | 2810049E08Rik |       |
| 1417681_at   | 1.3E-04 | 52 | down | Nudt21        | chr3  |
| 1451005_at   | 1.4E-04 | 53 | down | Sumo1         | chr1  |
| 1418292_at   | 1.4E-04 | 54 | down | Asna1         | chr8  |
| 1434646_s_at | 1.5E-04 | 55 | down | Sap18         | chr8  |
| 1455311_at   | 1.5E-04 | 56 | down | Dgcr8         | chr16 |
| 1419812_s_at | 1.5E-04 | 57 | down | D11Ert99e     | chr11 |
| 1423220_at   | 1.6E-04 | 58 | down | Eif4e         | chr3  |
| 1434356_a_at | 1.6E-04 | 59 | down | Psma5         | chr3  |
| 1418319_at   | 1.6E-04 | 60 | down | 1810047C23Rik | chr8  |
| 1448206_at   | 1.6E-04 | 61 | down | Psma2         | chr13 |
| 1417144_at   | 1.7E-04 | 62 | down | Tubg1         | chr11 |
| 1437125_at   | 1.7E-04 | 63 | up   | Camk2a        | chr18 |
| 1436042_at   | 1.9E-04 | 64 | down | Tln1          | chr4  |
| 1428764_at   | 2.1E-04 | 65 | up   | Gtl2          | chr12 |
| 1415741_at   | 2.1E-04 | 66 | down | Tparl         | chr5  |
| 1455172_at   | 2.2E-04 | 68 | down | AU020094      | chr14 |
| 1448808_a_at | 2.2E-04 | 67 | down | Nme2          | chr10 |
| 1448461_a_at | 2.3E-04 | 69 | down | 1500006O09Rik | chr14 |
| 1433535_x_at | 2.3E-04 | 70 | down | Cct2          | chr10 |
| 1423666_s_at | 2.4E-04 | 71 | down | Rpl5          | chr1  |
| 1415675_at   | 2.4E-04 | 72 | down | Dpm2          | chr2  |
| 1444077_at   | 2.6E-04 | 73 | down |               |       |
| 1451331_at   | 2.9E-04 | 74 | up   | Ppp1r1b       | chr11 |
| 1427886_at   | 3.0E-04 | 75 | up   | Pom121        | chr5  |
| 1456685_at   | 3.1E-04 | 76 | down | Nsg2          | chr11 |
| 1452047_at   | 3.1E-04 | 77 | down | Cacybp        | chr1  |
| 1426541_a_at | 3.3E-04 | 79 | up   | 2310067E08Rik | chr9  |
| 1416023_at   | 3.3E-04 | 78 | down | Fabp3         | chr4  |
| 1438403_s_at | 3.6E-04 | 80 | up   | BC003324      | chr19 |
| 1423281_at   | 3.6E-04 | 81 | down | Stmn2         | chr3  |
| 1417258_at   | 3.7E-04 | 82 | down | Cct5          | chr15 |
| 1428580_at   | 3.7E-04 | 83 | down | Blvra         | chr2  |
| 1442650_at   | 3.7E-04 | 84 | up   |               | chr3  |
| 1452692_a_at | 3.8E-04 | 85 | down | Ndufv2        | chr17 |
| 1460209_at   | 3.9E-04 | 86 | down | Usp39         | chr6  |
| 1451230_a_at | 3.9E-04 | 87 | down | Wbp5          | chrX  |
| 1460165_at   | 3.9E-04 | 88 | down | Ppp1ca        | chr19 |
| 1436383_at   | 3.9E-04 | 89 | up   | Cplx2         | chr13 |
| 1433670_at   | 3.9E-04 | 90 | down | Emp2          | chr16 |
| 1417316_at   | 3.9E-04 | 91 | down | Them2         | chr13 |



|              |         |     |      |               |       |
|--------------|---------|-----|------|---------------|-------|
| 1437704_at   | 4.0E-04 | 92  | down |               | chr13 |
| 1449362_a_at | 4.0E-04 | 93  | up   | Mink1         | chr11 |
| 1460698_a_at | 4.2E-04 | 94  | down | Sec1113       | chr18 |
| 1451366_at   | 4.2E-04 | 95  | down | Cops6         | chr5  |
| 1417339_a_at | 4.6E-04 | 97  | down | Dncl1         | chr5  |
| 1416037_a_at | 4.6E-04 | 96  | down | Cct2          | chr10 |
| 1452674_a_at | 4.7E-04 | 98  | down | Eif3s12       | chr7  |
| 1434149_at   | 4.7E-04 | 100 | up   | Tcf4          | chr18 |
| 1419073_at   | 4.7E-04 | 99  | down | Tmeff2        | chr1  |
| 1418002_at   | 5.2E-04 | 101 | down | Higd2a        | chr13 |
| 1416282_at   | 5.2E-04 | 102 | down | Psmc3         | chr2  |
| 1417891_at   | 5.3E-04 | 103 | down | Spsb3         | chr17 |
| 1437423_a_at | 5.3E-04 | 104 | down | Sra1          | chr18 |
| 1449622_s_at | 5.4E-04 | 106 | down | Atp6ap1       | chrX  |
| 1448300_at   | 5.4E-04 | 105 | down | Mgst3         | chr1  |
| 1424110_a_at | 5.6E-04 | 107 | down | Nme1          | chr11 |
| 1452882_at   | 5.6E-04 | 108 | down | Pgrmc2        | chr3  |
| 1433450_at   | 5.8E-04 | 109 | up   | Cdk5r1        | chr11 |
| 1423908_at   | 5.9E-04 | 110 | down | Ndufs8        | chr19 |
| 1418188_a_at | 6.0E-04 | 111 | up   | Malat1        | chr19 |
| 1460695_a_at | 6.1E-04 | 112 | up   | 2010111I01Rik | chr13 |
| 1433704_s_at | 6.2E-04 | 113 | down | Tloc1         | chr3  |
| 1426256_at   | 6.6E-04 | 114 | down | Timm17a       | chr1  |
| 1436134_at   | 7.2E-04 | 115 | down | Scn2b         | chr9  |
| 1443790_x_at | 7.3E-04 | 116 | down | 4930414L22Rik | chr6  |
| 1454921_at   | 7.3E-04 | 117 | down | Gm561         | chr2  |
| 1457040_at   | 7.5E-04 | 118 | down | Lgi2          | chr5  |
| 1428364_at   | 7.5E-04 | 119 | down | Scnm1         | chr3  |
| 1454805_at   | 7.7E-04 | 121 | down | Wtap          | chr2  |
| 1416005_at   | 7.7E-04 | 120 | down | Psmc1         | chr12 |
| 1433611_s_at | 7.9E-04 | 122 | down | C77604        | chr5  |
| 1416824_at   | 8.0E-04 | 124 | down | B230118H07Rik | chr2  |
| 1416058_s_at | 8.0E-04 | 123 | down | Atp5c1        | chr2  |
| 1416027_at   | 8.4E-04 | 125 | down | Pdcd6         | chr13 |
| 1451476_at   | 8.5E-04 | 128 | down | Zdhhc8        | chr16 |
| 1435017_at   | 8.5E-04 | 126 | down | Mel13         | chr11 |
| 1418189_s_at | 8.5E-04 | 127 | up   | Malat1        | chr19 |
| 1452837_at   | 8.5E-04 | 130 | up   | Lpin2         | chr17 |
| 1448972_at   | 8.5E-04 | 129 | up   | Gria1         | chr11 |
| 1423630_at   | 8.7E-04 | 131 | up   | Cygb          | chr11 |
| 1435488_at   | 9.0E-04 | 135 | down | C630010D07Rik | chr5  |
| 1435285_at   | 9.0E-04 | 132 | down | Mpped2        | chr2  |
| 1429627_at   | 9.0E-04 | 136 | down | Ppil3         | chr1  |
| 1423162_s_at | 9.0E-04 | 134 | up   | Spred1        | chr2  |
| 1416971_at   | 9.0E-04 | 133 | down | Cox7a2        | chr9  |
| 1420368_at   | 9.3E-04 | 137 | down | Denr          | chr5  |
| 1448790_at   | 9.4E-04 | 138 | up   | Sema6b        | chr17 |
| 1437466_at   | 9.5E-04 | 139 | down | Alcam         | chr16 |
| 1452877_at   | 9.5E-04 | 141 | down | 2700029M09Rik | chr8  |

|              |         |     |      |               |       |
|--------------|---------|-----|------|---------------|-------|
| 1428631_a_at | 9.5E-04 | 140 | down | Uqcrc2        | chr7  |
| 1437133_x_at | 9.7E-04 | 142 | down | Akr1b3        | chr1  |
| 1441947_x_at | 9.7E-04 | 143 | down | BC033915      | chr9  |
| 1426446_at   | 9.7E-04 | 144 | up   | 6430548M08Rik | chr8  |
| 1447904_s_at | 9.8E-04 | 146 | down | Fnta          | chr8  |
| 1438421_at   | 9.8E-04 | 145 | up   | Pvrl1         | chr9  |
| 1435231_at   | 9.8E-04 | 154 | down | Coq4          | chr2  |
| 1433662_s_at | 9.8E-04 | 153 | up   | Timp2         | chr11 |
| 1429896_at   | 9.8E-04 | 147 | down | 5830408B19Rik | chr10 |
| 1426762_s_at | 9.8E-04 | 148 | down | Aof2          | chr4  |
| 1423418_at   | 9.8E-04 | 150 | down | Fdps          | chr3  |
| 1422464_at   | 9.8E-04 | 151 | down | Mrpl3         | chr9  |
| 1417157_at   | 9.8E-04 | 152 | down | Actr10        | chr12 |
| 1415962_at   | 9.8E-04 | 149 | down | Eif3s3        | chr15 |
| 1435771_at   | 9.8E-04 | 155 | down | Plcb4         | chr2  |
| 1448799_s_at | 1.0E-03 | 156 | down | Mrps12        | chr7  |
| 1454978_at   | 1.0E-03 | 160 | up   | Ttyh3         | chr5  |
| 1439253_x_at | 1.0E-03 | 162 | down | 2610524G07Rik |       |
| 1427481_a_at | 1.0E-03 | 157 | up   | Atp1a3        | chr7  |
| 1420540_a_at | 1.0E-03 | 161 | down | Rit1          | chr3  |
| 1416979_at   | 1.0E-03 | 159 | down | 2510048O06Rik | chr5  |
| 1416000_a_at | 1.0E-03 | 158 | down | Prdx1         | chr4  |
| 1457218_at   | 1.0E-03 | 166 | down | 6430510M02Rik | chr2  |
| 1454813_at   | 1.0E-03 | 172 | down | 1110017O22Rik | chr7  |
| 1454716_x_at | 1.0E-03 | 168 | down | Cox5b         | chr1  |
| 1452680_at   | 1.0E-03 | 167 | down | Snrpd2        | chr7  |
| 1451217_a_at | 1.0E-03 | 169 | down | Immp1l        | chr2  |
| 1441959_s_at | 1.0E-03 | 164 | down | 1200003C05Rik | chr12 |
| 1438678_at   | 1.0E-03 | 165 | down | 1500011K16Rik | chr2  |
| 1436796_at   | 1.0E-03 | 170 | down | 1110061A14Rik | chr18 |
| 1435630_s_at | 1.0E-03 | 163 | down | Acat2         |       |
| 1424828_a_at | 1.0E-03 | 171 | down | Fh1           | chr1  |
| 1421446_at   | 1.0E-03 | 174 | up   | Prkcc         |       |
| 1419577_at   | 1.0E-03 | 173 | down | A530089I17Rik | chr10 |
| 1436674_at   | 1.1E-03 | 176 | down | Rap2ip        |       |
| 1427914_a_at | 1.1E-03 | 175 | down | Tceb1         | chr1  |
| 1435395_s_at | 1.1E-03 | 177 | down | Atp5j2        | chr5  |
| 1448238_at   | 1.1E-03 | 178 | down | 2700060E02Rik | chr3  |
| 1416399_a_at | 1.1E-03 | 179 | down | Hmox2         | chr16 |
| 1419256_at   | 1.2E-03 | 180 | up   | Spnb2         | chr11 |
| 1452082_at   | 1.2E-03 | 181 | up   | 6430548M08Rik | chr8  |
| 1424786_s_at | 1.2E-03 | 182 | down | Wdr45         | chrX  |
| 1420642_a_at | 1.2E-03 | 183 | down | 2010100O12Rik | chr2  |
| 1416604_at   | 1.2E-03 | 184 | down | Cyc1          | chr15 |
| 1429264_at   | 1.2E-03 | 185 | down | C030044B11Rik | chr13 |
| 1416313_at   | 1.3E-03 | 186 | down | Mllt11        | chr3  |
| 1450049_a_at | 1.3E-03 | 187 | down | Hira          | chr16 |
| 1451049_at   | 1.3E-03 | 189 | down | Bcap31        | chrX  |
| 1426373_at   | 1.3E-03 | 188 | up   | Ski           | chr4  |

|              |         |     |      |               |       |
|--------------|---------|-----|------|---------------|-------|
| 1428541_at   | 1.3E-03 | 190 | up   | 3321401G04Rik | chr6  |
| 1425383_a_at | 1.3E-03 | 191 | up   | Pbx1          | chr1  |
| 1423737_at   | 1.3E-03 | 192 | down | Ndufs3        | chr2  |
| 1448822_at   | 1.3E-03 | 193 | down | Psemb6        | chr11 |
| 1444120_at   | 1.3E-03 | 194 | up   | Bin1          | chr18 |
| 1444291_at   | 1.4E-03 | 195 | down | 4930506D23Rik | chr7  |
| 1416669_s_at | 1.4E-03 | 196 | down | Naca          | chr10 |
| 1427878_at   | 1.4E-03 | 197 | down | 0610010O12Rik | chr18 |
| 1426371_at   | 1.4E-03 | 198 | up   | Mlstd2        | chr7  |
| 1435113_x_at | 1.4E-03 | 199 | down | Stmn3         |       |
| 1416834_x_at | 1.4E-03 | 200 | down | Ndufb2        | chr6  |
| 1416668_at   | 1.4E-03 | 201 | down | 4921531G14Rik | chr15 |
| 1424001_at   | 1.4E-03 | 202 | down | Mki67ip       | chr1  |
| 1417105_at   | 1.4E-03 | 203 | down | 1810017G16Rik | chr8  |
| 1428588_a_at | 1.4E-03 | 204 | down | Mrpl41        | chr2  |
| 1435437_at   | 1.5E-03 | 205 | up   |               | chr3  |
| 1449273_at   | 1.5E-03 | 206 | up   | Cyfp2         | chr11 |
| 1438682_at   | 1.5E-03 | 207 | up   | Pik3r1        | chr13 |
| 1455574_at   | 1.5E-03 | 208 | up   | 9430023P16Rik | chr1  |
| 1451385_at   | 1.5E-03 | 209 | down | 2310056P07Rik | chr16 |
| 1416877_a_at | 1.5E-03 | 210 | down | Mrpl51        | chr6  |
| 1418137_at   | 1.5E-03 | 211 | down | Mrp63         | chr14 |
| 1453582_at   | 1.5E-03 | 213 | up   | Chka          | chr19 |
| 1424147_at   | 1.5E-03 | 212 | down | Ahsa1         | chr12 |
| 1448368_at   | 1.5E-03 | 214 | down | Dctn6         | chr8  |
| 1460729_at   | 1.5E-03 | 215 | up   | Rock1         | chr18 |
| 1429839_a_at | 1.6E-03 | 216 | down | Yaf2          | chr15 |
| 1423728_at   | 1.6E-03 | 217 | down | Eif3s6ip      | chr15 |
| 1424665_at   | 1.6E-03 | 218 | down | 5430405G24Rik | chr11 |
| 1442913_at   | 1.6E-03 | 219 | up   |               |       |
| 1428118_at   | 1.6E-03 | 220 | up   | Lrrn6a        | chr9  |
| 1453713_s_at | 1.6E-03 | 221 | up   | 4930546H06Rik | chr17 |
| 1426761_at   | 1.6E-03 | 222 | down | Aof2          | chr4  |
| 1456614_at   | 1.7E-03 | 223 | down | Acn9          | chr6  |
| 1434280_at   | 1.7E-03 | 224 | up   |               |       |
| 1455960_at   | 1.7E-03 | 226 | up   | Egfl5         | chr4  |
| 1452142_at   | 1.7E-03 | 228 | up   | Slc6a1        | chr6  |
| 1433598_at   | 1.7E-03 | 225 | up   | 9430010O03Rik | chr8  |
| 1419255_at   | 1.7E-03 | 227 | up   | Spnb2         | chr11 |
| 1450853_at   | 1.7E-03 | 231 | down | Tle4          | chr19 |
| 1450668_s_at | 1.7E-03 | 229 | down | Hspe1         | chr1  |
| 1448465_at   | 1.7E-03 | 230 | down | Nipsnap1      | chr11 |
| 1452346_at   | 1.8E-03 | 232 | down | B3gnt6        | chr19 |
| 1434053_x_at | 1.8E-03 | 235 | down | Atp5k         | chr5  |
| 1429004_at   | 1.8E-03 | 234 | down | Phip          | chr9  |
| 1417077_at   | 1.8E-03 | 233 | down | Bcap29        | chr12 |
| 1460198_a_at | 1.8E-03 | 237 | down | Psemb3        | chr11 |
| 1423815_at   | 1.8E-03 | 236 | down | Ddx56         | chr11 |
| 1438091_a_at | 1.8E-03 | 239 | down | H2afz         | chr3  |

|              |         |     |      |               |       |
|--------------|---------|-----|------|---------------|-------|
| 1433955_at   | 1.8E-03 | 238 | down | Brwd1         | chr16 |
| 1433460_at   | 1.9E-03 | 240 | up   | Ttc7b         | chr12 |
| 1449255_a_at | 1.9E-03 | 241 | down | Rpl15         | chr4  |
| 1424412_at   | 1.9E-03 | 242 | down | Ogfrl1        | chr1  |
| 1460697_s_at | 1.9E-03 | 245 | down | 2610209M04Rik | chr6  |
| 1449162_at   | 1.9E-03 | 244 | down | Pop7          | chr5  |
| 1416902_a_at | 1.9E-03 | 243 | down | Cox5b         | chr1  |
| 1436226_at   | 2.0E-03 | 246 | down | Tceb1         | chr1  |
| 1430123_a_at | 2.0E-03 | 247 | down | Akr1a4        | chr4  |
| 1455006_at   | 2.0E-03 | 248 | down | 2310016M24Rik | chr15 |
| 1428163_at   | 2.0E-03 | 250 | down | Sara2         | chr11 |
| 1416269_at   | 2.0E-03 | 249 | down | Atp5j2        | chr5  |
| 1416782_s_at | 2.0E-03 | 251 | down | Praf2         | chrX  |
| 1423181_s_at | 2.0E-03 | 252 | down | Clns1a        | chr7  |
| 1455620_at   | 2.0E-03 | 254 | down | chr7          |       |
| 1451205_at   | 2.0E-03 | 253 | down | Psemb4        | chr3  |
| 1416478_a_at | 2.0E-03 | 255 | down | Mdh2          | chr5  |
| 1457268_at   | 2.1E-03 | 256 | up   | Dot1l         | chr10 |
| 1430231_a_at | 2.1E-03 | 257 | up   | C030018L16Rik | chr9  |
| 1448287_at   | 2.1E-03 | 259 | down | Rpo1-3        | chr5  |
| 1428463_a_at | 2.1E-03 | 258 | up   | Ppp2r5e       | chr12 |
| 1426544_a_at | 2.1E-03 | 260 | up   | Ttc14         | chr3  |
| 1428180_at   | 2.1E-03 | 261 | down | 2810422J05Rik | chr8  |
| 1437759_at   | 2.2E-03 | 262 | up   | Pitrm1        | chr13 |
| 1427003_at   | 2.2E-03 | 263 | down | Ppp2r5c       | chr12 |
| 1452415_at   | 2.3E-03 | 264 | up   | Actn1         | chr12 |
| 1456125_a_at | 2.3E-03 | 265 | down | Dncl1         | chr5  |
| 1449505_at   | 2.3E-03 | 266 | down | Kpna1         | chr16 |
| 1460237_at   | 2.3E-03 | 267 | up   | Trim8         | chr19 |
| 1424760_a_at | 2.3E-03 | 268 | down | Smyd2         | chr1  |
| 1438986_x_at | 2.3E-03 | 270 | down | Rps17         | chr11 |
| 1436986_at   | 2.3E-03 | 269 | up   | Sntb2         | chr8  |
| 1436935_x_at | 2.3E-03 | 271 | down | Clns1a        | chr7  |
| 1427267_at   | 2.3E-03 | 272 | up   | Zfp469        | chr5  |
| 1434244_x_at | 2.3E-03 | 273 | down | Htf9c         | chr16 |
| 1428406_s_at | 2.3E-03 | 274 | down | Hcfc1r1       | chr17 |
| 1434124_x_at | 2.3E-03 | 275 | down | 2400001E08Rik | chr7  |
| 1449712_s_at | 2.4E-03 | 276 | down | Atp6v1e1      | chr6  |
| 1421027_a_at | 2.4E-03 | 277 | up   | Mef2c         | chr13 |
| 1450968_at   | 2.4E-03 | 278 | down | Uqcrfs1       | chr13 |
| 1448109_a_at | 2.4E-03 | 282 | down | Rpl26         | chr5  |
| 1439605_at   | 2.4E-03 | 280 | up   |               | chr6  |
| 1428526_at   | 2.4E-03 | 281 | down | 1500034E06Rik | chr11 |
| 1418134_at   | 2.4E-03 | 279 | down | 1200007B05Rik | chr18 |
| 1429087_at   | 2.4E-03 | 283 | down | 1110054O05Rik | chr4  |
| 1425018_at   | 2.4E-03 | 284 | down | Mcts1         | chrX  |
| 1417368_s_at | 2.4E-03 | 285 | down | Ndufa2        | chr18 |
| 1435347_at   | 2.4E-03 | 286 | down | Stau1         | chr2  |
| 1448319_at   | 2.5E-03 | 288 | down | LOC432549     | chr1  |

|              |         |     |      |               |       |
|--------------|---------|-----|------|---------------|-------|
| 1436780_at   | 2.5E-03 | 289 | up   | Ogt           | chrX  |
| 1428573_at   | 2.5E-03 | 287 | down | Chn2          | chr6  |
| 1423799_at   | 2.5E-03 | 290 | down | Eif1          | chr11 |
| 1440816_x_at | 2.5E-03 | 291 | down | Ddx1          | chr12 |
| 1418439_at   | 2.6E-03 | 292 | down | D10Erttd322e  | chr10 |
| 1422627_a_at | 2.6E-03 | 293 | down | Mkks          | chr2  |
| 1441960_x_at | 2.6E-03 | 294 | down | 5730494M16Rik | chr18 |
| 1417147_at   | 2.6E-03 | 295 | down | B230317C12Rik | chr2  |
| 1457446_at   | 2.6E-03 | 296 | up   | Opcml         | chr9  |
| 1436221_at   | 2.6E-03 | 297 | up   | D1Erttd471e   | chr1  |
| 1450674_at   | 2.6E-03 | 298 | down | Cdk5          | chr5  |
| 1427875_a_at | 2.7E-03 | 299 | down | 1100001I22Rik | chr3  |
| 1423266_at   | 2.7E-03 | 301 | down | 2810405K02Rik | chr4  |
| 1416853_at   | 2.7E-03 | 300 | up   | Ncdn          | chr4  |
| 1460195_at   | 2.7E-03 | 304 | down | Mrps11        | chr7  |
| 1438289_a_at | 2.7E-03 | 305 | down | Sumo1         | chr1  |
| 1416938_at   | 2.7E-03 | 302 | down | Chchd1        | chr14 |
| 1416284_at   | 2.7E-03 | 303 | down | Mrpl28        | chr17 |
| 1427432_a_at | 2.7E-03 | 306 | down | Sfrs10        | chr3  |
| 1422733_at   | 2.7E-03 | 308 | up   | Fjx1          | chr2  |
| 1421375_a_at | 2.7E-03 | 307 | down | S100a6        | chr3  |
| 1437510_x_at | 2.7E-03 | 309 | down | Rps17         | chr12 |
| 1416663_at   | 2.7E-03 | 310 | down | Ndufa9        | chr6  |
| 1429192_at   | 2.8E-03 | 312 | up   | Ski           | chr4  |
| 1427385_s_at | 2.8E-03 | 311 | up   | Actn1         | chr12 |
| 1453728_a_at | 2.8E-03 | 313 | down | Mrps17        | chr5  |
| 1423507_a_at | 2.8E-03 | 314 | down | Sirt2         | chr7  |
| 1433700_at   | 2.8E-03 | 315 | down | 4933433P14Rik | chr12 |
| 1420632_a_at | 2.8E-03 | 316 | down | Bscl2         | chr19 |
| 1448442_a_at | 2.9E-03 | 322 | down | Psma3         | chr12 |
| 1438889_at   | 2.9E-03 | 319 | down |               | chrX  |
| 1437801_at   | 2.9E-03 | 320 | down | Morf4l1       | chr9  |
| 1425691_at   | 2.9E-03 | 318 | up   | B3gat1        | chr9  |
| 1420113_s_at | 2.9E-03 | 323 | down | 2410022L05Rik | chr8  |
| 1416963_at   | 2.9E-03 | 321 | down | Ubadc1        | chr2  |
| 1416843_at   | 2.9E-03 | 317 | down | Pde6d         | chr1  |
| 1422483_a_at | 2.9E-03 | 324 | down | Cycs          | chr16 |
| 1436894_at   | 2.9E-03 | 325 | up   | 5330438I03Rik | chr1  |
| 1454919_at   | 2.9E-03 | 330 | down | Nmt2          | chr2  |
| 1448685_at   | 2.9E-03 | 329 | down | 2900010M23Rik | chr17 |
| 1448147_at   | 2.9E-03 | 331 | up   | Tnfrsf19      | chr14 |
| 1437327_x_at | 2.9E-03 | 326 | down | 2310057D15Rik | chr5  |
| 1435959_at   | 2.9E-03 | 328 | down | Arhgap15      | chr2  |
| 1434159_at   | 2.9E-03 | 327 | up   | Stk4          | chr2  |
| 1460230_at   | 3.0E-03 | 333 | up   | Syn2          | chr6  |
| 1439095_at   | 3.0E-03 | 332 | up   | Sfrs11        | chr3  |
| 1416655_at   | 3.0E-03 | 334 | down | C1galt1c1     | chrX  |
| 1455248_at   | 3.0E-03 | 335 | down | 0610011N22Rik | chr13 |
| 1433625_at   | 3.1E-03 | 336 | up   | 5830434P21Rik | chr2  |

|              |         |     |      |               |       |
|--------------|---------|-----|------|---------------|-------|
| 1448212_at   | 3.1E-03 | 337 | down | Tnfsf5ip1     | chr18 |
| 1426542_at   | 3.1E-03 | 338 | up   | 2310067E08Rik | chr9  |
| 1459909_at   | 3.1E-03 | 339 | up   | Nfix          | chr8  |
| 1451512_s_at | 3.1E-03 | 340 | down | Hibch         | chr1  |
| 1435245_at   | 3.1E-03 | 341 | down | Gls2          | chr10 |
| 1434216_a_at | 3.1E-03 | 342 | down | Nudt19        | chr7  |
| 1435246_at   | 3.1E-03 | 343 | up   | Paqr8         | chr1  |
| 1448122_at   | 3.1E-03 | 344 | down | Tcp1          | chr17 |
| 1435364_at   | 3.1E-03 | 346 | down | Cyhr1         | chr2  |
| 1416415_a_at | 3.1E-03 | 345 | down | H2afz         | chr3  |
| 1438774_s_at | 3.2E-03 | 347 | up   | Pgm2l1        | chr18 |
| 1459563_x_at | 3.2E-03 | 348 | up   |               |       |
| 1438033_at   | 3.2E-03 | 349 | up   | Tef           | chr15 |
| 1422442_at   | 3.2E-03 | 351 | down | Smu1          | chr4  |
| 1421127_at   | 3.2E-03 | 350 | down | Tmem42        | chr9  |
| 1418577_at   | 3.2E-03 | 352 | up   | Trim8         | chr19 |
| 1417720_at   | 3.2E-03 | 353 | down | Polr2j        | chr5  |
| 1456110_at   | 3.3E-03 | 354 | up   | Ankrd11       | chr8  |
| 1448697_s_at | 3.3E-03 | 355 | down | Rpl36al       | chr12 |
| 1448602_at   | 3.3E-03 | 356 | up   | Pygm          | chr19 |
| 1416789_at   | 3.3E-03 | 357 | down | ldh3g         | chrX  |
| 1437167_at   | 3.3E-03 | 359 | up   | Tmod2         | chr9  |
| 1421149_a_at | 3.3E-03 | 358 | up   | Atn1          | chr6  |
| 1429708_at   | 3.4E-03 | 361 | down | Ndufa11       | chr17 |
| 1424539_at   | 3.4E-03 | 360 | down | Ubl4          | chrX  |
| 1437524_x_at | 3.4E-03 | 362 | down | Coro7         |       |
| 1448430_a_at | 3.4E-03 | 363 | down | Naca          | chr10 |
| 1422748_at   | 3.4E-03 | 364 | up   | Zfhx1b        | chr2  |
| 1440097_at   | 3.4E-03 | 365 | up   | Mirg          | chr12 |
| 1428989_at   | 3.4E-03 | 366 | down | 0710001D07Rik | chr17 |
| 1460588_at   | 3.4E-03 | 368 | down | chr1          |       |
| 1431145_a_at | 3.4E-03 | 367 | down | Cuedc2        | chr19 |
| 1417035_at   | 3.4E-03 | 369 | down | Sac3d1        | chr19 |
| 1450241_a_at | 3.4E-03 | 370 | down | Evi2a         | chr11 |
| 1424740_at   | 3.4E-03 | 371 | down | Creb3         | chr4  |
| 1438993_a_at | 3.5E-03 | 372 | down | Atp6v1d       | chr12 |
| 1428468_at   | 3.5E-03 | 373 | down | 3110043O21Rik | chr4  |
| 1415972_at   | 3.5E-03 | 374 | up   | Marcks        | chr10 |
| 1422964_at   | 3.6E-03 | 375 | down | Rad23a        | chr8  |
| 1416499_a_at | 3.6E-03 | 376 | down | Dctn6         | chr8  |
| 1417510_at   | 3.6E-03 | 377 | down | Vps4a         | chr8  |
| 1448398_s_at | 3.6E-03 | 378 | up   | Rpl22         | chr4  |
| 1421122_at   | 3.6E-03 | 379 | up   | Cbll1         | chr12 |
| 1423538_at   | 3.6E-03 | 380 | down | Ntan1         | chr16 |
| 1416045_a_at | 3.7E-03 | 381 | down | Smarcb1       | chr10 |
| 1451569_at   | 3.7E-03 | 383 | up   | Nr2c2         | chr6  |
| 1448418_s_at | 3.7E-03 | 384 | down | Wdr23         | chr14 |
| 1433449_at   | 3.7E-03 | 382 | down | B930037P14Rik | chr19 |
| 1419414_at   | 3.8E-03 | 385 | down | Gng13         | chr17 |

|              |         |     |      |               |       |
|--------------|---------|-----|------|---------------|-------|
| 1439566_at   | 3.8E-03 | 386 | up   | C030038J10Rik | chr6  |
| 1423772_x_at | 3.8E-03 | 387 | down | Slc25a5       | chr5  |
| 1425690_at   | 3.9E-03 | 388 | up   | B3gat1        | chr9  |
| 1430124_x_at | 3.9E-03 | 389 | down | Akr1a4        | chr4  |
| 1430129_a_at | 3.9E-03 | 390 | down | Commd8        | chr5  |
| 1436850_at   | 3.9E-03 | 391 | up   | Creg2         | chr1  |
| 1428936_at   | 3.9E-03 | 392 | up   | Atp2b1        | chr10 |
| 1429610_a_at | 3.9E-03 | 393 | down | Zfp511        | chr7  |
| 1459987_s_at | 3.9E-03 | 398 | down | Cct3          | chr3  |
| 1456137_at   | 3.9E-03 | 397 | up   | Nrxn3         | chr12 |
| 1452872_at   | 3.9E-03 | 394 | down | 2900054D09Rik | chr10 |
| 1438671_at   | 3.9E-03 | 395 | up   | Ppp2r2c       | chr5  |
| 1426352_s_at | 3.9E-03 | 396 | up   | Tial1         | chr7  |
| 1460192_at   | 3.9E-03 | 400 | down | Osbp1a        | chr18 |
| 1428201_at   | 3.9E-03 | 399 | down | 2310036O22Rik | chr8  |
| 1438193_at   | 4.0E-03 | 401 | up   | Nrxn3         | chr12 |
| 1422501_s_at | 4.0E-03 | 402 | down | ldh3a         | chr9  |
| 1450694_at   | 4.0E-03 | 403 | down | Fkbp2         | chr19 |
| 1434579_x_at | 4.0E-03 | 404 | down | Ndufs8        |       |
| 1435976_at   | 4.0E-03 | 405 | down |               | chr4  |
| 1455340_at   | 4.0E-03 | 407 | down | 3010003L21Rik | chr6  |
| 1448770_a_at | 4.0E-03 | 406 | down | Atpif1        | chr4  |
| 1436455_at   | 4.0E-03 | 408 | down | Asph          | chr4  |
| 1441170_a_at | 4.1E-03 | 410 | up   | Dab2ip        | chr2  |
| 1416452_at   | 4.1E-03 | 409 | down | Oat           | chr7  |
| 1429810_at   | 4.1E-03 | 411 | up   | 4921505C17Rik | chr15 |
| 1452599_s_at | 4.1E-03 | 412 | down | Al413582      | chr17 |
| 1425265_a_at | 4.2E-03 | 413 | down | Prnpip1       | chr4  |
| 1458114_at   | 4.2E-03 | 415 | up   | Samd12        | chr15 |
| 1424925_at   | 4.2E-03 | 414 | down | Sec63         | chr10 |
| 1417988_at   | 4.2E-03 | 416 | down | Resp18        | chr1  |
| 1426565_at   | 4.2E-03 | 417 | up   | Igf1r         | chr7  |
| 1426543_x_at | 4.2E-03 | 419 | up   | 2310067E08Rik | chr9  |
| 1416353_at   | 4.2E-03 | 418 | down | Nr1h2         | chr7  |
| 1452285_a_at | 4.2E-03 | 421 | down | Eif3s5        | chr7  |
| 1429918_at   | 4.2E-03 | 422 | down | Arhgap20      | chr9  |
| 1424877_a_at | 4.2E-03 | 420 | down | Alad          | chr4  |
| 1425784_a_at | 4.3E-03 | 423 | up   | Olfm1         | chr2  |
| 1416508_at   | 4.3E-03 | 424 | down | Med28         | chr5  |
| 1456204_at   | 4.4E-03 | 426 | down | 2010107H07Rik | chr14 |
| 1435011_x_at | 4.4E-03 | 425 | down | Akr1a4        | chr4  |
| 1451110_at   | 4.4E-03 | 427 | up   | Egln1         | chr8  |
| 1439940_at   | 4.4E-03 | 428 | up   | 2900019G14Rik | chr2  |
| 1448959_at   | 4.4E-03 | 429 | down | Ndufs4        | chr13 |
| 1449840_at   | 4.4E-03 | 430 | up   | Sntb2         | chr8  |
| 1422945_a_at | 4.5E-03 | 431 | up   | Kif5c         | chr2  |
| 1450467_at   | 4.5E-03 | 432 | up   | Bsn           | chr9  |
| 1435112_a_at | 4.5E-03 | 433 | down | Atp5h         | chr11 |
| 1428527_at   | 4.5E-03 | 435 | down | Snx7          | chr3  |

|              |         |     |      |               |       |
|--------------|---------|-----|------|---------------|-------|
| 1427665_a_at | 4.5E-03 | 437 | up   | Nfic          | chr10 |
| 1425143_a_at | 4.5E-03 | 440 | down | Ndufs1        | chr1  |
| 1424137_at   | 4.5E-03 | 438 | up   | Gprin1        | chr13 |
| 1423415_at   | 4.5E-03 | 434 | down | Gpr83         | chr9  |
| 1421115_a_at | 4.5E-03 | 436 | down | Zdhhc16       | chr19 |
| 1416984_at   | 4.5E-03 | 439 | down | Mrps18a       | chr17 |
| 1447919_x_at | 4.5E-03 | 441 | down | Ndufab1       | chr7  |
| 1455044_at   | 4.5E-03 | 442 | down | Tmem44        | chr16 |
| 1428257_s_at | 4.5E-03 | 444 | down | Dncl2a        | chr2  |
| 1419743_s_at | 4.5E-03 | 443 | down | Carm1         | chr9  |
| 1444008_at   | 4.6E-03 | 445 | down | H2afy3        | chr10 |
| 1439481_at   | 4.6E-03 | 446 | down | AI845704      | chr1  |
| 1455420_at   | 4.7E-03 | 447 | down | Rad23b        | chr4  |
| 1418212_at   | 4.7E-03 | 448 | down | Omg           | chr11 |
| 1419472_s_at | 4.7E-03 | 449 | down | Nudc          | chr4  |
| 1457336_at   | 4.7E-03 | 450 | up   | R3hdm1        | chr1  |
| 1452705_at   | 4.7E-03 | 455 | down | AA415817      | chr16 |
| 1452148_at   | 4.7E-03 | 451 | down | Lrpap1        | chr5  |
| 1439436_x_at | 4.7E-03 | 454 | down | Incenp        |       |
| 1421507_at   | 4.7E-03 | 452 | up   | Olfr78        | chr7  |
| 1418754_at   | 4.7E-03 | 453 | down | Adcy8         | chr15 |
| 1416118_at   | 4.7E-03 | 456 | down |               | chr3  |
| 1440801_s_at | 4.7E-03 | 457 | up   | Adrbk2        | chr5  |
| 1435967_s_at | 4.7E-03 | 458 | down | Hibadh        | chr6  |
| 1425587_a_at | 4.7E-03 | 459 | up   | Ptprij        | chr2  |
| 1416568_a_at | 4.7E-03 | 460 | up   | Acin1         | chr14 |
| 1420934_a_at | 4.8E-03 | 461 | up   | Srrm1         | chr4  |
| 1438026_at   | 4.8E-03 | 462 | down | 2310030G09Rik |       |
| 1425854_x_at | 4.8E-03 | 465 | down | Tcrb-V13      | chr6  |
| 1423838_s_at | 4.8E-03 | 466 | down | 2400003C14Rik | chr8  |
| 1423150_at   | 4.8E-03 | 464 | down | Sgne1         | chr2  |
| 1416360_at   | 4.8E-03 | 463 | up   | Snag1         | chr13 |
| 1418327_at   | 4.8E-03 | 467 | down | 1110058L19Rik | chr1  |
| 1438420_at   | 4.8E-03 | 468 | up   | Rnpc2         | chr2  |
| 1427955_a_at | 4.9E-03 | 469 | down | Deb1          | chr9  |
| 1423328_at   | 4.9E-03 | 470 | down | Gdap1         | chr1  |
| 1416395_at   | 4.9E-03 | 471 | down | Guk1          | chr11 |
| 1440516_at   | 4.9E-03 | 472 | down |               | chrX  |
| 1456892_at   | 4.9E-03 | 474 | up   | D030036P13Rik | chrX  |
| 1453314_x_at | 4.9E-03 | 475 | down | 2610039C10Rik | chr16 |
| 1436908_at   | 4.9E-03 | 477 | down | Pcm1          | chr8  |
| 1434799_x_at | 4.9E-03 | 476 | down | Aldoa         | chr7  |
| 1432004_a_at | 4.9E-03 | 473 | up   | Dnm2          | chr9  |
| 1430529_at   | 4.9E-03 | 479 | up   | Csnk1a1       | chr18 |
| 1428986_at   | 4.9E-03 | 478 | up   | Slc17a7       | chr7  |
| 1424441_at   | 4.9E-03 | 481 | down | Slc27a4       | chr2  |
| 1423947_at   | 4.9E-03 | 482 | down | 1110008P14Rik | chr2  |
| 1418412_at   | 4.9E-03 | 483 | down | Tpd52l1       | chr10 |
| 1416556_at   | 4.9E-03 | 480 | down | Tspan31       | chr10 |



|              |         |     |      |               |       |
|--------------|---------|-----|------|---------------|-------|
| 1460196_at   | 5.0E-03 | 484 | down | Cbr1          | chr16 |
| 1417913_at   | 5.0E-03 | 485 | down | 2810037C03Rik | chr8  |
| 1417128_at   | 5.0E-03 | 486 | down | 2810052M02Rik | chr3  |
| 1443863_at   | 5.0E-03 | 487 | up   | Fndc3a        | chr14 |
| 1454806_at   | 5.1E-03 | 488 | up   | D12ErtD553e   | chr12 |
| 1428322_a_at | 5.1E-03 | 489 | down | Ndufb10       | chr17 |
| 1437131_x_at | 5.1E-03 | 490 | down | Mrpl11        | chr19 |
| 1426766_at   | 5.1E-03 | 491 | down | 6330403K07Rik | chr11 |
| 1430985_at   | 5.1E-03 | 493 | down | 1810027O10Rik | chr11 |
| 1417040_a_at | 5.1E-03 | 492 | down | Bok           | chr1  |
| 1437519_x_at | 5.1E-03 | 494 | down | Hagh          | chr17 |
| 1416699_at   | 5.1E-03 | 495 | down | 1110008F13Rik | chr2  |
| 1448335_s_at | 5.2E-03 | 496 | up   | Ccni          | chr5  |
| 1427153_at   | 5.2E-03 | 497 | down | Bckdhb        | chr9  |
| 1452866_at   | 5.2E-03 | 498 | down | Nars          | chr18 |
| 1451141_at   | 5.2E-03 | 499 | down | BC004636      | chr2  |
| 1437862_at   | 5.2E-03 | 500 | up   | 2600011C06Rik | chr12 |
| 1422433_s_at | 5.2E-03 | 501 | down | ldh1          | chr1  |
| 1417840_at   | 5.2E-03 | 502 | down | 1500031L02Rik | chr16 |
| 1448141_at   | 5.2E-03 | 505 | down | 1110014J01Rik | chr9  |
| 1444422_at   | 5.2E-03 | 508 | up   | Pcdh19        | chrX  |
| 1426646_at   | 5.2E-03 | 507 | down | 9130011J15Rik | chr8  |
| 1416143_at   | 5.2E-03 | 503 | down | Atp5j         | chr16 |
| 1415911_at   | 5.2E-03 | 506 | down | Impact        | chr18 |
| 1415760_s_at | 5.2E-03 | 504 | down | Atox1         | chr11 |
| 1434864_at   | 5.3E-03 | 510 | down | Nipa1         | chr7  |
| 1416278_a_at | 5.3E-03 | 509 | down | Atp5o         | chr12 |
| 1443017_at   | 5.3E-03 | 512 | up   | Cpeb2         | chr5  |
| 1428179_at   | 5.3E-03 | 513 | down | Ndufv2        | chr17 |
| 1427822_a_at | 5.3E-03 | 511 | up   | Copg2as2      |       |
| 1456341_a_at | 5.3E-03 | 514 | up   | Klf9          | chr19 |
| 1451742_a_at | 5.3E-03 | 515 | down | Ugp2          | chr11 |
| 1435602_at   | 5.3E-03 | 516 | down | Sephs2        | chr7  |
| 1437283_at   | 5.4E-03 | 518 | up   | Tnpo2         | chr8  |
| 1421137_a_at | 5.4E-03 | 517 | down | Pkib          | chr10 |
| 1452000_s_at | 5.4E-03 | 521 | down | Sars1         | chr3  |
| 1449012_s_at | 5.4E-03 | 520 | down | Fndc4         | chr5  |
| 1434653_at   | 5.4E-03 | 522 | up   | Ptk2b         | chr14 |
| 1418311_at   | 5.4E-03 | 519 | down | Fn3k          | chr11 |
| 1426245_s_at | 5.4E-03 | 523 | up   | Mapre2        | chr18 |
| 1424523_at   | 5.5E-03 | 524 | down | Elmo1         | chr13 |
| 1452043_at   | 5.5E-03 | 529 | down | 2310011J03Rik | chr10 |
| 1437675_at   | 5.5E-03 | 530 | up   | Slc8a1        | chr17 |
| 1435738_x_at | 5.5E-03 | 527 | down | Serf2         | chr2  |
| 1428765_at   | 5.5E-03 | 526 | up   | Gtl2          | chr12 |
| 1428073_a_at | 5.5E-03 | 532 | down | Nup88         | chr11 |
| 1423160_at   | 5.5E-03 | 528 | up   | Spred1        | chr2  |
| 1422797_at   | 5.5E-03 | 531 | down | MGI:1932697   | chr3  |
| 1421875_a_at | 5.5E-03 | 525 | down | Mrps23        | chr11 |

|              |         |     |      |               |       |
|--------------|---------|-----|------|---------------|-------|
| 1432164_a_at | 5.5E-03 | 533 | down | Gcsh          | chr8  |
| 1442418_at   | 5.5E-03 | 535 | up   | B930096F20Rik | chr19 |
| 1434946_at   | 5.5E-03 | 534 | up   | C330021A05Rik | chr12 |
| 1420844_at   | 5.5E-03 | 536 | up   | Ubqln2        | chrX  |
| 1423317_at   | 5.5E-03 | 537 | down | 3110001D03Rik | chr4  |
| 1459860_x_at | 5.5E-03 | 539 | up   | Trim2         |       |
| 1434393_at   | 5.5E-03 | 538 | down | Usp34         | chr11 |
| 1448345_at   | 5.5E-03 | 540 | down | Tomm34        | chr2  |
| 1416841_at   | 5.6E-03 | 541 | down | 1110059E24Rik | chr19 |
| 1430546_at   | 5.6E-03 | 542 | down | Cryz11        | chr16 |
| 1431680_a_at | 5.6E-03 | 543 | up   | Ptprk         | chr10 |
| 1435699_at   | 5.6E-03 | 544 | down | Ppm1l         | chr3  |
| 1434172_at   | 5.6E-03 | 545 | up   | chr4          |       |
| 1455228_at   | 5.6E-03 | 547 | down | chr5          |       |
| 1435650_at   | 5.6E-03 | 548 | down | Hapln4        | chr8  |
| 1423820_at   | 5.6E-03 | 546 | down | Elof1         | chr9  |
| 1434887_at   | 5.6E-03 | 549 | up   | Freq          | chr2  |
| 1416742_at   | 5.7E-03 | 551 | down | Cfdp1         | chr8  |
| 1416327_at   | 5.7E-03 | 550 | down | Ufc1          | chr1  |
| 1430154_at   | 5.7E-03 | 552 | down | 4930543C13Rik | chr19 |
| 1456656_at   | 5.7E-03 | 554 | up   | Lin7a         | chr10 |
| 1427293_a_at | 5.7E-03 | 553 | up   | Auts2         | chr5  |
| 1415820_x_at | 5.8E-03 | 555 | down | Nono          | chrX  |
| 1436349_at   | 5.8E-03 | 556 | down | 2700094K13Rik | chr2  |
| 1435392_at   | 5.8E-03 | 557 | down | Wdr17         | chr8  |
| 1456759_at   | 5.8E-03 | 558 | down | 6430556C10Rik | chr2  |
| 1435026_at   | 5.8E-03 | 559 | up   | Spock2        | chr10 |
| 1425183_a_at | 5.8E-03 | 560 | down | Rpl4          | chr9  |
| 1416292_at   | 5.8E-03 | 561 | down | Prdx3         | chr19 |
| 1451643_a_at | 5.8E-03 | 562 | down | Rab4b         | chr7  |
| 1429515_at   | 5.8E-03 | 563 | up   | Ubr2          | chr17 |
| 1420354_at   | 5.8E-03 | 564 | up   | Cnnm1         | chr19 |
| 1429453_a_at | 5.8E-03 | 565 | down | Mrpl55        | chr11 |
| 1450372_a_at | 5.8E-03 | 566 | down | Rpl18         | chr6  |
| 1451018_at   | 5.8E-03 | 567 | down | Leprotl1      | chr8  |
| 1438194_at   | 5.8E-03 | 568 | up   | 2900019G14Rik | chr2  |
| 1447412_at   | 5.8E-03 | 569 | up   | Gm996         | chr2  |
| 1435152_at   | 5.9E-03 | 570 | up   | Leng8         | chr7  |
| 1434971_x_at | 5.9E-03 | 571 | down |               | chr1  |
| 1455821_x_at | 5.9E-03 | 577 | down | C1qbp         | chr11 |
| 1455377_at   | 5.9E-03 | 574 | down | 4921517B04Rik | chr3  |
| 1454655_at   | 5.9E-03 | 573 | up   | Dgkd          | chr1  |
| 1449921_s_at | 5.9E-03 | 576 | up   | Cpne6         | chr14 |
| 1437239_x_at | 5.9E-03 | 575 | down | Phc2          | chr4  |
| 1416921_x_at | 5.9E-03 | 572 | down | Aldoa         | chr7  |
| 1450661_x_at | 5.9E-03 | 578 | up   | Nfic          | chr10 |
| 1417236_at   | 6.0E-03 | 579 | up   | Ehd3          | chr17 |
| 1454843_at   | 6.0E-03 | 580 | down | Prps2         | chrX  |
| 1455905_at   | 6.0E-03 | 581 | up   | 2610507B11Rik | chr11 |

|              |         |     |      |               |       |
|--------------|---------|-----|------|---------------|-------|
| 1423557_at   | 6.0E-03 | 582 | down | lfngnr2       | chr16 |
| 1431411_a_at | 6.0E-03 | 583 | down | Rai12         | chr11 |
| 1436364_x_at | 6.0E-03 | 590 | down | Nfix          | chr8  |
| 1435187_at   | 6.0E-03 | 587 | down | Tomm20        | chr8  |
| 1427542_at   | 6.0E-03 | 588 | up   | 5330439J01Rik | chr10 |
| 1426283_at   | 6.0E-03 | 585 | up   | MGI:2446259   | chr9  |
| 1419581_at   | 6.0E-03 | 589 | up   | Dlgh4         | chr11 |
| 1419287_at   | 6.0E-03 | 584 | down | MGI:1913570   | chr8  |
| 1416291_at   | 6.0E-03 | 586 | down | Psmc4         | chr7  |
| 1424572_a_at | 6.0E-03 | 591 | up   | H2afy         | chr13 |
| 1431804_a_at | 6.0E-03 | 592 | up   | Sp3           | chr2  |
| 1416567_s_at | 6.1E-03 | 593 | down | Atp5e         | chr2  |
| 1415990_at   | 6.1E-03 | 594 | down | Vdac2         | chr14 |
| 1436968_x_at | 6.1E-03 | 595 | up   | Klhl24        | chr16 |
| 1434105_at   | 6.1E-03 | 597 | down | Epm2aip1      | chr9  |
| 1428382_at   | 6.1E-03 | 596 | up   | Smarcc2       | chr10 |
| 1450848_at   | 6.1E-03 | 598 | down | Dap3          | chr3  |
| 1417075_at   | 6.2E-03 | 599 | down | 2010309E21Rik | chr6  |
| 1452927_x_at | 6.2E-03 | 600 | down | Tpi1          | chr6  |
| 1436343_at   | 6.3E-03 | 601 | up   | Chd4          | chr6  |
| 1450638_at   | 6.3E-03 | 603 | down | Pdcd5         | chr1  |
| 1416175_a_at | 6.3E-03 | 602 | down | Vdac3         | chr14 |
| 1444468_at   | 6.3E-03 | 604 | up   | Paqr8         | chr1  |
| 1449940_a_at | 6.4E-03 | 606 | down | Eif2b4        | chr5  |
| 1421028_a_at | 6.4E-03 | 605 | up   | Mef2c         | chr13 |
| 1427908_at   | 6.4E-03 | 607 | down | Bnip1         | chr17 |
| 1448609_at   | 6.4E-03 | 608 | down | Tst           | chr15 |
| 1448342_at   | 6.4E-03 | 610 | down | Mapk10        | chr5  |
| 1431619_a_at | 6.4E-03 | 609 | down | Dtnbp1        | chr13 |
| 1451035_a_at | 6.4E-03 | 611 | down | Akr1a4        | chr4  |
| 1418228_at   | 6.4E-03 | 612 | down | Hirip5        | chr6  |
| 1441625_at   | 6.4E-03 | 613 | up   | A930033C01Rik | chr5  |
| 1438719_at   | 6.4E-03 | 614 | up   | Al585793      | chr18 |
| 1460684_at   | 6.4E-03 | 615 | down | Tm7sf2        | chr19 |
| 1428428_at   | 6.4E-03 | 616 | down | Abhd11        | chr5  |
| 1450068_at   | 6.5E-03 | 617 | down | Baz1b         | chr5  |
| 1423597_at   | 6.5E-03 | 618 | up   | Atp8a1        | chr5  |
| 1418331_at   | 6.5E-03 | 619 | down | 1110031I02Rik | chr11 |
| 1452130_at   | 6.6E-03 | 620 | down | Txndc14       | chr2  |
| 1437783_x_at | 6.6E-03 | 621 | down | Tmem4         | chr10 |
| 1458870_x_at | 6.6E-03 | 622 | up   | Phr1          |       |
| 1440285_at   | 6.6E-03 | 623 | down | Ppp1r9a       | chr6  |
| 1427411_s_at | 6.6E-03 | 624 | up   | Dleu2         | chr14 |
| 1416850_s_at | 6.6E-03 | 625 | down | D10Ert214e    | chr10 |
| 1436746_at   | 6.6E-03 | 626 | up   | Wnk1          | chr6  |
| 1423883_at   | 6.6E-03 | 627 | down | Acsl1         | chr8  |
| 1437977_at   | 6.6E-03 | 628 | down | Sgtb          | chr13 |
| 1427578_a_at | 6.6E-03 | 629 | down | ltgb4bp       | chr2  |
| 1416491_at   | 6.7E-03 | 630 | up   | Numbl         | chr7  |

|              |         |     |      |               |       |
|--------------|---------|-----|------|---------------|-------|
| 1415909_at   | 6.7E-03 | 631 | down | Stip1         | chr19 |
| 1416486_at   | 6.8E-03 | 632 | down | Scye1         | chr3  |
| 1448292_at   | 6.8E-03 | 633 | down | Uqcr          | chr10 |
| 1436123_at   | 6.8E-03 | 634 | up   | Bsn           | chr9  |
| 1435620_at   | 6.8E-03 | 635 | down | 1190002J23Rik | chr1  |
| 1438680_at   | 6.8E-03 | 636 | up   | Auts2         | chr5  |
| 1448753_at   | 6.9E-03 | 638 | down | Srp9          | chr1  |
| 1439410_x_at | 6.9E-03 | 637 | down | D11Ert333e    | chr11 |
| 1450906_at   | 6.9E-03 | 639 | up   | Plxnc1        | chr10 |
| 1453087_at   | 6.9E-03 | 640 | down | 6330403L08Rik | chr5  |
| 1428596_at   | 6.9E-03 | 641 | down | 2700008N14Rik | chr11 |
| 1448663_s_at | 7.0E-03 | 642 | down | Mvd           | chr8  |
| 1426494_at   | 7.0E-03 | 643 | down | Rg9mtd3       | chr4  |
| 1454797_at   | 7.1E-03 | 645 | down | Tmem55b       | chr14 |
| 1453207_at   | 7.1E-03 | 644 | down | LOC554362     | chr8  |
| 1452044_at   | 7.1E-03 | 646 | down | Arpc5l        | chr2  |
| 1434009_at   | 7.1E-03 | 647 | down | 6430596G11Rik | chr7  |
| 1434245_a_at | 7.2E-03 | 648 | down | Cybasc3       | chr19 |
| 1433603_at   | 7.2E-03 | 649 | down | Ndufs6        | chr13 |
| 1455911_x_at | 7.2E-03 | 655 | down | Ndufb11       | chr5  |
| 1450894_a_at | 7.2E-03 | 656 | down | Ap2m1         | chr2  |
| 1429382_at   | 7.2E-03 | 650 | down | Nr1i3         | chr1  |
| 1425845_a_at | 7.2E-03 | 657 | up   | Shoc2         | chr19 |
| 1420997_a_at | 7.2E-03 | 651 | down | Gpi1          | chr7  |
| 1416678_at   | 7.2E-03 | 653 | down | Cops3         | chr11 |
| 1416185_a_at | 7.2E-03 | 652 | down | Adh5          | chr3  |
| 1415727_at   | 7.2E-03 | 654 | down | Apoa1bp       | chr3  |
| 1448868_at   | 7.2E-03 | 658 | down | Scand1        | chr2  |
| 1456279_a_at | 7.2E-03 | 660 | down | Bcap31        | chr10 |
| 1452585_at   | 7.2E-03 | 659 | down | Mrps28        | chr3  |
| 1438829_at   | 7.2E-03 | 663 | up   | Gm96          | chr18 |
| 1428499_at   | 7.2E-03 | 665 | down | 2810454L23Rik | chrX  |
| 1426360_at   | 7.2E-03 | 661 | up   | Zc3h11a       | chr1  |
| 1417762_a_at | 7.2E-03 | 664 | down | Rpl8          | chr15 |
| 1416197_at   | 7.2E-03 | 662 | down | Snrp1c        | chr15 |
| 1455892_x_at | 7.2E-03 | 666 | up   |               |       |
| 1449028_at   | 7.2E-03 | 670 | up   | Rhou          | chr8  |
| 1445534_at   | 7.2E-03 | 669 | up   | Flnb          | chr14 |
| 1427027_a_at | 7.2E-03 | 668 | down | Gtf3a         | chr5  |
| 1425299_s_at | 7.2E-03 | 667 | down | 0610038D11Rik | chr19 |
| 1435875_at   | 7.2E-03 | 672 | up   | Prkab2        | chr3  |
| 1434305_at   | 7.2E-03 | 671 | down | MGC30332      | chr7  |
| 1419045_at   | 7.3E-03 | 674 | up   | Slc25a23      | chr17 |
| 1416312_at   | 7.3E-03 | 673 | down | Rars          | chr11 |
| 1437852_x_at | 7.3E-03 | 675 | down | Cpsf3         | chr12 |
| 1450866_a_at | 7.3E-03 | 677 | down | Mrpl17        | chr7  |
| 1449234_at   | 7.3E-03 | 678 | down | Car15         | chr16 |
| 1418506_a_at | 7.3E-03 | 676 | down | Prdx2         | chr8  |
| 1448263_a_at | 7.3E-03 | 679 | down | Cndp2         | chr18 |

|              |         |     |      |               |       |
|--------------|---------|-----|------|---------------|-------|
| 1452291_at   | 7.3E-03 | 680 | down | Centd1        | chr5  |
| 1422778_at   | 7.3E-03 | 681 | down | Taf9          | chr13 |
| 1419924_at   | 7.3E-03 | 682 | down |               | chr11 |
| 1428540_at   | 7.4E-03 | 684 | up   | 3321401G04Rik | chr6  |
| 1415783_at   | 7.4E-03 | 683 | down | Vps35         | chr8  |
| 1415766_at   | 7.4E-03 | 685 | down | 4930564D15Rik | chr3  |
| 1457366_at   | 7.4E-03 | 688 | up   | Cdc40         | chr10 |
| 1439421_x_at | 7.4E-03 | 687 | down | chr1          |       |
| 1417126_a_at | 7.4E-03 | 686 | down | Rpl22l1       | chr3  |
| 1453421_at   | 7.5E-03 | 690 | down | Srr           | chr11 |
| 1437774_at   | 7.5E-03 | 689 | up   | 1700020I14Rik | chr2  |
| 1428076_s_at | 7.5E-03 | 691 | down | Ndufb4        | chr16 |
| 1435659_a_at | 7.5E-03 | 692 | down | Tpi1          | chr6  |
| 1442026_at   | 7.6E-03 | 693 | up   |               | chr9  |
| 1427510_at   | 7.7E-03 | 694 | up   | Gnai1         | chr5  |
| 1442867_at   | 7.7E-03 | 696 | up   | 2410080H04Rik | chr9  |
| 1423692_at   | 7.7E-03 | 698 | down | Ndufa8        | chr2  |
| 1422556_at   | 7.7E-03 | 697 | up   | Gna13         | chr11 |
| 1416859_at   | 7.7E-03 | 695 | down | Fkbp3         | chr12 |
| 1435500_at   | 7.7E-03 | 701 | down | Rab26         | chr17 |
| 1429106_at   | 7.7E-03 | 700 | down | 4921509J17Rik | chr3  |
| 1426894_s_at | 7.7E-03 | 699 | down | C230093N12Rik | chr2  |
| 1434065_at   | 7.7E-03 | 702 | down | Cwf19l1       | chr19 |
| 1456444_at   | 7.7E-03 | 703 | up   | Fbxo41        | chr6  |
| 1457361_at   | 7.8E-03 | 704 | up   | C630007C17Rik | chr2  |
| 1452662_a_at | 7.8E-03 | 705 | down | Eif2s1        | chr12 |
| 1415859_at   | 7.8E-03 | 706 | up   | Eif3s8        | chr7  |
| 1418814_s_at | 7.8E-03 | 707 | down | Ndufa12       | chr10 |
| 1417028_a_at | 7.8E-03 | 708 | up   | Trim2         | chr3  |
| 1455283_x_at | 7.8E-03 | 709 | down | Ndufs8        | chr19 |
| 1420628_at   | 7.8E-03 | 710 | down | Pura          | chr18 |
| 1460304_a_at | 7.8E-03 | 711 | up   | Ubf           | chr11 |
| 1452479_at   | 7.8E-03 | 712 | up   | Copg2as2      |       |
| 1458685_at   | 7.8E-03 | 713 | up   | Garnl1        | chr12 |
| 1437288_at   | 7.9E-03 | 714 | up   | Impad1        | chr4  |
| 1417050_at   | 7.9E-03 | 716 | down | C1qtnf4       | chr2  |
| 1416119_at   | 7.9E-03 | 715 | down | Txn1          | chr1  |
| 1452742_at   | 7.9E-03 | 717 | up   | 2310001H13Rik | chr9  |
| 1429244_at   | 7.9E-03 | 718 | down | 2610524H06Rik |       |
| 1426340_at   | 7.9E-03 | 719 | up   | Slc1a3        | chr15 |
| 1419493_a_at | 8.0E-03 | 720 | down | Tpd52         | chr3  |
| 1460554_s_at | 8.0E-03 | 722 | down | Glg1          | chr8  |
| 1452189_at   | 8.0E-03 | 721 | down | 9430077D24Rik | chr9  |
| 1427437_at   | 8.0E-03 | 724 | up   | chr9          |       |
| 1417058_a_at | 8.0E-03 | 723 | down | Krtcap2       | chr3  |
| 1416636_at   | 8.0E-03 | 725 | down | Rheb          | chr5  |
| 1448406_at   | 8.0E-03 | 727 | up   | Cri1          | chr2  |
| 1433616_a_at | 8.0E-03 | 726 | down | 2310028O11Rik | chr4  |
| 1436902_x_at | 8.1E-03 | 728 | down | Tmsb10        | chr7  |

|              |         |     |      |               |       |
|--------------|---------|-----|------|---------------|-------|
| 1428554_a_at | 8.2E-03 | 729 | down | 1810035L17Rik | chr12 |
| 1437001_at   | 8.2E-03 | 730 | up   | Gsk3b         | chr16 |
| 1435067_at   | 8.2E-03 | 732 | down | B230208H17Rik | chr2  |
| 1424091_at   | 8.2E-03 | 731 | down | AI449175      | chr8  |
| 1416367_at   | 8.2E-03 | 733 | down | 1110001J03Rik | chr6  |
| 1424751_at   | 8.3E-03 | 734 | down | Abt1          | chr13 |
| 1451080_at   | 8.4E-03 | 735 | down | Usp1          | chr4  |
| 1425531_at   | 8.4E-03 | 736 | down | Znhit1        | chr5  |
| 1448112_at   | 8.4E-03 | 737 | down | Cox7c         | chr11 |
| 1435866_s_at | 8.6E-03 | 738 | down | Hist3h2a      | chr11 |
| 1423966_at   | 8.6E-03 | 740 | up   | Cd99l2        | chrX  |
| 1423958_a_at | 8.6E-03 | 739 | down | 2900001O04Rik | chr15 |
| 1418171_at   | 8.6E-03 | 741 | down | Tceal8        | chrX  |
| 1445502_at   | 8.7E-03 | 742 | up   | chr8          |       |
| 1438735_at   | 8.7E-03 | 743 | up   | Hbxap         | chr7  |
| 1459984_at   | 8.7E-03 | 745 | up   | Mia3          | chrUn |
| 1416807_at   | 8.7E-03 | 744 | down | Rpl36a        | chrX  |
| 1457744_at   | 8.7E-03 | 753 | up   | Ddx46         | chr13 |
| 1457248_x_at | 8.7E-03 | 748 | down | Hsd17b7       | chr1  |
| 1450662_at   | 8.7E-03 | 746 | down | Tesk1         | chr4  |
| 1450070_s_at | 8.7E-03 | 750 | down | Pak1          | chr7  |
| 1437118_at   | 8.7E-03 | 752 | up   | Usp7          | chr16 |
| 1434882_at   | 8.7E-03 | 749 | up   | Mtdh          | chr15 |
| 1429582_at   | 8.7E-03 | 755 | up   | Btbd14a       | chr2  |
| 1424350_s_at | 8.7E-03 | 756 | up   | Lpgat1        | chr1  |
| 1424313_a_at | 8.7E-03 | 758 | down | Ndufs7        | chr10 |
| 1421751_a_at | 8.7E-03 | 747 | down | Psmc14        | chr2  |
| 1419509_a_at | 8.7E-03 | 754 | down | Nagk          | chr6  |
| 1417472_at   | 8.7E-03 | 751 | up   | Myh9          | chr15 |
| 1415791_at   | 8.7E-03 | 757 | down | Rnf34         | chr5  |
| 1438344_at   | 8.8E-03 | 760 | up   | 4833424O15Rik | chr3  |
| 1421504_at   | 8.8E-03 | 759 | up   | Sp4           | chr12 |
| 1452825_at   | 8.8E-03 | 763 | down | 5330410G16Rik | chr8  |
| 1448203_at   | 8.8E-03 | 761 | down | Atp5l         | chr9  |
| 1417046_at   | 8.8E-03 | 762 | down | Tusc4         | chr9  |
| 1420416_at   | 8.8E-03 | 764 | down | Sema3a        | chr5  |
| 1449980_a_at | 8.8E-03 | 767 | down | Gabrd         | chr4  |
| 1443225_at   | 8.8E-03 | 766 | up   | Acvr1c        | chr2  |
| 1428362_at   | 8.8E-03 | 765 | down | E130105L11Rik | chr7  |
| 1428465_at   | 8.9E-03 | 768 | down | 5033425B17Rik | chr7  |
| 1438771_at   | 8.9E-03 | 769 | up   | Brd1          | chr15 |
| 1435337_at   | 9.0E-03 | 770 | down | Zfp537        | chr7  |
| 1425573_a_at | 9.0E-03 | 772 | up   | Ddef1         | chr15 |
| 1423240_at   | 9.0E-03 | 771 | up   |               | chr2  |
| 1422580_at   | 9.0E-03 | 774 | down | Myl4          | chr11 |
| 1417879_at   | 9.0E-03 | 773 | down | Nenf          | chr1  |
| 1424365_at   | 9.1E-03 | 775 | down | 1810037I17Rik | chrX  |
| 1449187_at   | 9.2E-03 | 777 | down | Pdgfra        | chr5  |
| 1428584_a_at | 9.2E-03 | 778 | down | Haghl         | chr17 |

|              |         |     |      |               |       |
|--------------|---------|-----|------|---------------|-------|
| 1426432_a_at | 9.2E-03 | 776 | up   | Slc4a4        | chr5  |
| 1448726_at   | 9.2E-03 | 779 | down | Snapc2        | chr8  |
| 1455662_x_at | 9.2E-03 | 780 | down | Rps17         | chr7  |
| 1451988_s_at | 9.2E-03 | 782 | down | Chmp4b        | chr2  |
| 1451540_at   | 9.2E-03 | 781 | down | Mpi1          | chr9  |
| 1448542_at   | 9.3E-03 | 783 | down | Bccip         | chr7  |
| 1448524_s_at | 9.3E-03 | 784 | down | Ssr4          | chrX  |
| 1460637_s_at | 9.3E-03 | 785 | down | Pfdn5         | chr15 |
| 1449648_s_at | 9.3E-03 | 786 | down | Rpo1-1        | chr17 |
| 1446565_at   | 9.3E-03 | 787 | up   | Man1b         |       |
| 1449435_at   | 9.4E-03 | 788 | down | B4galt3       | chr1  |
| 1443694_at   | 9.4E-03 | 789 | down | Rgs20         | chr1  |
| 1439767_at   | 9.4E-03 | 791 | up   | Dlgap2        | chr8  |
| 1429579_at   | 9.4E-03 | 792 | down | 6330407118Rik | chr9  |
| 1427909_at   | 9.4E-03 | 794 | down | 2410015M20Rik | chr17 |
| 1426862_at   | 9.4E-03 | 793 | up   | 9130023F12Rik | chr11 |
| 1426341_at   | 9.4E-03 | 797 | up   | Slc1a3        | chr15 |
| 1424207_at   | 9.4E-03 | 795 | up   | Smarca5       | chr4  |
| 1416894_at   | 9.4E-03 | 796 | down | 1500019G21Rik | chr7  |
| 1415860_at   | 9.4E-03 | 790 | down | Kpna2         | chr4  |
| 1436113_a_at | 9.5E-03 | 798 | down | St13          | chr15 |
| 1434702_at   | 9.5E-03 | 799 | down | 2600009E05Rik | chr2  |
| 1452333_at   | 9.5E-03 | 801 | up   | Smarca2       | chr19 |
| 1450818_a_at | 9.5E-03 | 802 | down | Ndufa7        | chr17 |
| 1428515_at   | 9.5E-03 | 800 | down | 2410012H22Rik | chr11 |
| 1440443_at   | 9.5E-03 | 803 | up   | E030016H06Rik | chr2  |
| 1455081_at   | 9.5E-03 | 804 | down | Txn14b        | chr8  |
| 1448625_at   | 9.5E-03 | 806 | down | Golga2        | chr2  |
| 1447995_x_at | 9.5E-03 | 805 | down | 1700026B20Rik | chr12 |
| 1452629_at   | 9.5E-03 | 807 | up   | Safb2         | chr17 |
| 1441645_s_at | 9.5E-03 | 808 | down | lpo9          | chr1  |
| 1436949_a_at | 9.5E-03 | 809 | down | Tceb2         | chr17 |
| 1435171_at   | 9.6E-03 | 810 | down | 2810416G20Rik | chr3  |
| 1440729_at   | 9.6E-03 | 812 | up   | Eps15         | chr4  |
| 1416595_at   | 9.6E-03 | 813 | down | Mrps22        | chr9  |
| 1453187_at   | 9.7E-03 | 815 | down | Ociad2        | chr5  |
| 1421141_a_at | 9.7E-03 | 814 | up   | Foxp1         | chr6  |
| 1423035_s_at | 9.7E-03 | 817 | down | Txn15         | chr11 |
| 1422467_at   | 9.7E-03 | 816 | down | Ppt1          | chr4  |
| 1427254_at   | 9.7E-03 | 818 | up   | Zfp445        | chr9  |
| 1450147_at   | 9.7E-03 | 827 | up   | Nptxr         | chr15 |
| 1447404_at   | 9.7E-03 | 819 | down | G630064H08Rik | chr18 |
| 1426480_at   | 9.7E-03 | 823 | down | Sbds          | chr5  |
| 1426468_at   | 9.7E-03 | 821 | down | 0610037L13Rik | chr4  |
| 1424364_a_at | 9.7E-03 | 822 | down | 1110020P15Rik | chr11 |
| 1424163_at   | 9.7E-03 | 826 | down | 0610039K22Rik | chr11 |
| 1423109_s_at | 9.7E-03 | 825 | down | Slc25a20      | chr9  |
| 1422264_s_at | 9.7E-03 | 824 | up   | Klf9          | chr19 |
| 1418444_a_at | 9.7E-03 | 820 | down | MGI:1891827   | chr7  |

|              |         |     |      |               |       |
|--------------|---------|-----|------|---------------|-------|
| 1428589_at   | 9.7E-03 | 829 | down | Mrpl41        | chr2  |
| 1423833_a_at | 9.7E-03 | 828 | down | Brp44         | chr1  |
| 1439578_at   | 9.8E-03 | 830 | up   | Lsm11         | chr11 |
| 1452659_at   | 9.9E-03 | 831 | down | Dek           | chr13 |
| 1418185_at   | 9.9E-03 | 832 | down | 4733401H18Rik | chr9  |
| 1417083_at   | 1.0E-02 | 833 | down | Sec61b        | chr4  |
| 1456041_at   | 1.0E-02 | 834 | down | Snx16         | chr3  |

---

**HPC**


---

|              |         |    |      |               |       |
|--------------|---------|----|------|---------------|-------|
| 1452434_s_at | 5.2E-11 | 0  | down | Dgcr6         | chr16 |
| 1428190_at   | 3.1E-10 | 1  | down | Slc25a1       | chr16 |
| 1449183_at   | 3.9E-10 | 2  | down | Comt          | chr16 |
| 1418087_at   | 7.2E-09 | 3  | down | Ufd1l         | chr16 |
| 1448900_at   | 7.2E-09 | 4  | down | D16H22S680E   | chr16 |
| 1448849_at   | 2.3E-08 | 5  | down | Mrpl40        | chr16 |
| 1452357_at   | 2.3E-08 | 6  | down | Gp1bb         | chr16 |
| 1422547_at   | 4.4E-08 | 7  | down | Ranbp1        | chr16 |
| 1421810_at   | 6.9E-08 | 8  | down | Dgcr2         | chr16 |
| 1428753_a_at | 1.3E-07 | 9  | down | Dgcr6         | chr16 |
| 1421809_at   | 3.2E-07 | 10 | down | Dgcr2         | chr16 |
| 1432367_a_at | 1.5E-06 | 11 | down | Ufd1l         | chr16 |
| 1448114_a_at | 1.7E-06 | 12 | down | Htf9c         | chr16 |
| 1436468_at   | 2.9E-06 | 13 | down | Zdhhc8        | chr16 |
| 1460033_at   | 3.2E-06 | 14 | up   | C030002C11Rik | chr1  |
| 1417629_at   | 3.8E-06 | 15 | down | Prodh         | chr16 |
| 1419732_at   | 7.2E-06 | 16 | down | Rtn4r         | chr16 |
| 1448115_at   | 8.5E-06 | 17 | down | Htf9c         | chr16 |
| 1418701_at   | 1.0E-05 | 18 | down | Comt          | chr16 |
| 1435179_at   | 1.4E-05 | 19 | up   | C130071C03Rik | chr13 |
| 1436241_s_at | 1.9E-05 | 20 | down | Hira          | chr16 |
| 1435089_at   | 3.5E-05 | 21 | up   | 2010111I01Rik | chr13 |
| 1441312_at   | 9.0E-05 | 22 | up   |               | chr19 |
| 1422977_at   | 9.4E-05 | 23 | down | Gp1bb         | chr16 |
| 1455326_at   | 1.1E-04 | 24 | up   | 4932416N17Rik | chr16 |
| 1440357_at   | 1.1E-04 | 25 | up   |               | chr15 |
| 1424038_a_at | 1.2E-04 | 26 | up   | 2310044H10Rik | chr7  |
| 1435439_at   | 1.3E-04 | 27 | down | Dgcr8         | chr16 |
| 1457030_at   | 1.4E-04 | 28 | up   | Mirg          | chr12 |
| 1450467_at   | 1.5E-04 | 29 | up   | Bsn           | chr9  |
| 1416822_at   | 1.8E-04 | 30 | down | Es2el         | chr16 |
| 1450855_at   | 2.7E-04 | 31 | down | Arvcf         | chr16 |
| 1455311_at   | 3.7E-04 | 32 | down | Dgcr8         | chr16 |
| 1427410_at   | 5.2E-04 | 33 | up   | Dleu2         | chr14 |
| 1449888_at   | 5.2E-04 | 34 | up   | Epas1         | chr17 |
| 1422733_at   | 5.3E-04 | 35 | up   | Fjx1          | chr2  |
| 1423125_at   | 6.6E-04 | 36 | up   | Dcamkl1       | chr3  |
| 1433450_at   | 1.1E-03 | 37 | up   | Cdk5r1        | chr11 |
| 1420506_a_at | 1.2E-03 | 38 | up   | Stxbp1        | chr2  |
| 1452742_at   | 1.2E-03 | 39 | up   | 2310001H13Rik | chr9  |



|              |         |    |      |               |       |
|--------------|---------|----|------|---------------|-------|
| 1441391_at   | 1.2E-03 | 40 | down | Gnb1l         | chr9  |
| 1423061_at   | 1.3E-03 | 41 | down | Arvcf         | chr16 |
| 1457675_at   | 1.3E-03 | 42 | down | 2510002D24Rik | chr16 |
| 1438196_at   | 1.5E-03 | 43 | up   | Gpd1l         | chr9  |
| 1436796_at   | 1.8E-03 | 44 | down | 1110061A14Rik | chr18 |
| 1460650_at   | 1.9E-03 | 45 | up   | Atp6v0a1      | chr11 |
| 1425691_at   | 2.1E-03 | 46 | up   | B3gat1        | chr9  |
| 1442072_at   | 2.2E-03 | 47 | up   | C230081A13Rik | chr9  |
| 1421890_at   | 2.3E-03 | 48 | up   | St3gal2       | chr8  |
| 1428562_at   | 2.5E-03 | 49 | up   | 2210403K04Rik | chr11 |
| 1419049_at   | 2.6E-03 | 50 | up   | Pcnx          | chr12 |
| 1420833_at   | 3.2E-03 | 51 | up   | Vamp2         | chr11 |
| 1423915_at   | 3.3E-03 | 52 | up   | Olfml2b       | chr1  |
| 1425461_at   | 3.5E-03 | 53 | up   | Fbxw11        | chr11 |
| 1416821_at   | 3.7E-03 | 54 | down | Es2el         | chr16 |
| 1418151_at   | 3.7E-03 | 55 | up   | Mtmt4         | chr11 |
| 1441782_at   | 4.1E-03 | 56 | up   | Aak1          | chr6  |
| 1431254_at   | 4.4E-03 | 57 | up   | Kbtbd11       | chr8  |
| 1416132_at   | 4.5E-03 | 58 | up   | C920006C10Rik | chr15 |
| 1449931_at   | 4.6E-03 | 59 | up   | Cpeb4         | chr11 |
| 1425690_at   | 4.6E-03 | 61 | up   | B3gat1        | chr9  |
| 1450913_at   | 4.6E-03 | 60 | up   | B4galt6       | chr18 |
| 1450166_at   | 4.7E-03 | 62 | up   | Ids           | chrX  |
| 1428986_at   | 4.9E-03 | 63 | up   | Slc17a7       | chr7  |
| 1460164_at   | 4.9E-03 | 64 | up   | Spin          | chr13 |
| 1428739_at   | 4.9E-03 | 66 | down | 2310040A07Rik | chr4  |
| 1460617_s_at | 4.9E-03 | 65 | up   | Rab6b         | chr9  |
| 1421123_at   | 5.2E-03 | 67 | up   | Cdk5r1        | chr11 |
| 1437118_at   | 5.4E-03 | 68 | up   | Usp7          | chr16 |
| 1431214_at   | 5.5E-03 | 70 | up   | 1300007C21Rik |       |
| 1415804_at   | 5.5E-03 | 69 | up   | Cx3cl1        | chr8  |
| 1422223_at   | 6.3E-03 | 71 | up   | Grin2b        | chr6  |
| 1454706_at   | 6.3E-03 | 72 | up   | Uvrag         | chr7  |
| 1449097_at   | 6.4E-03 | 73 | down | Txnrd2        | chr16 |
| 1455836_at   | 6.4E-03 | 74 | up   | Papola        | chr12 |
| 1450955_s_at | 6.4E-03 | 75 | up   | Sort1         | chr3  |
| 1452490_a_at | 6.5E-03 | 76 | up   | Ap2a2         | chr7  |
| 1420816_at   | 6.6E-03 | 81 | up   | Ywhag         | chr5  |
| 1434244_x_at | 6.6E-03 | 77 | down | Htf9c         | chr16 |
| 1451992_at   | 6.6E-03 | 80 | up   | Adrbk1        | chr19 |
| 1434751_at   | 6.6E-03 | 79 | up   | Ids           | chrX  |
| 1455000_at   | 6.6E-03 | 78 | up   | Gpr68         | chr12 |
| 1452747_at   | 6.9E-03 | 82 | up   | Atp13a2       | chr4  |
| 1421580_at   | 7.1E-03 | 83 | up   | Cntnap1       | chr11 |
| 1422966_a_at | 7.7E-03 | 84 | up   | Tfrc          | chr16 |
| 1438255_at   | 8.0E-03 | 85 | down | Ches1         | chr12 |
| 1449961_at   | 8.2E-03 | 86 | up   | Rph3a         | chr5  |
| 1456283_at   | 8.3E-03 | 87 | up   | Neto1         | chr18 |
| 1417839_at   | 8.4E-03 | 88 | down | Cldn5         | chr16 |

|            |         |    |    |        |      |
|------------|---------|----|----|--------|------|
| 1421200_at | 8.7E-03 | 89 | up | Dlgh2  | chr7 |
| 1424476_at | 9.6E-03 | 90 | up | Camkk2 | chr5 |
| 1427254_at | 9.8E-03 | 91 | up | Zfp445 | chr9 |
| 1452226_at | 9.8E-03 | 92 | up | Rcc2   | chr4 |
| 1450849_at | 9.8E-03 | 93 | up | Hnrpu  | chr1 |

**Supplementary Table 2. Probe sets located outside *Df(16)A* and included in the common PFC/HPC gene list (FDR *P*-value < 0.01)**

| Probe Set ID | Gene Name            | Chr   | PFC                 |             |           | HPC                 |             |           | miRNA(s) within the gene |
|--------------|----------------------|-------|---------------------|-------------|-----------|---------------------|-------------|-----------|--------------------------|
|              |                      |       | FDR <i>P</i> -value | Fold Change | Direction | FDR <i>P</i> -value | Fold Change | Direction |                          |
| 1460033_at   | <i>C030002C11Rik</i> | chr1  | 2.24E-07            | 2.05        | up        | 3.22E-06            | 1.76        | up        | mir-29b-2, 29c           |
| 1440357_at   |                      | chr15 | 2.24E-07            | 2.33        | up        | 1.06E-04            | 1.93        | up        | mir-let-7b,let-7c-2      |
| 1428562_at   | <i>2210403K04Rik</i> | chr11 | 3.56E-07            | 1.43        | up        | 2.47E-03            | 1.39        | up        | mir-22                   |
| 1457030_at   | <i>Mirg</i>          | chr12 | 3.63E-07            | 1.66        | up        | 1.45E-04            | 1.80        | up        | mirna clusters. mir-134  |
| 1435179_at   | <i>C130071C03Rik</i> | chr13 | 2.40E-06            | 1.47        | up        | 1.42E-05            | 1.50        | up        | mir-9-2                  |
| 1435089_at   | <i>2010111I01Rik</i> | chr13 | 1.41E-05            | 1.87        | up        | 3.53E-05            | 1.67        | up        | mir-23b, 27b,24-1        |
| 1424038_a_at | <i>2310044H10Rik</i> | chr7  | 1.70E-05            | 1.45        | up        | 1.17E-04            | 1.38        | up        |                          |
| 1455326_at   | <i>4932416N17Rik</i> | chr16 | 1.70E-05            | 1.65        | up        | 1.06E-04            | 2.09        | up        |                          |
| 1433450_at   | <i>Cdk5r1</i>        | chr11 | 5.79E-04            | 1.18        | up        | 1.11E-03            | 1.18        | up        |                          |
| 1436796_at   | <i>1110061A14Rik</i> | chr18 | 1.04E-03            | 1.29        | down      | 1.80E-03            | 1.35        | down      |                          |
| 1422733_at   | <i>Fjx1</i>          | chr2  | 2.70E-03            | 1.59        | up        | 5.32E-04            | 1.75        | up        |                          |
| 1425691_at   | <i>B3gat1</i>        | chr9  | 2.86E-03            | 1.36        | up        | 2.09E-03            | 1.44        | up        |                          |
| 1425690_at   | <i>B3gat1</i>        | chr9  | 3.87E-03            | 1.48        | up        | 4.64E-03            | 1.39        | up        |                          |
| 1450467_at   | <i>Bsn</i>           | chr9  | 4.46E-03            | 1.51        | up        | 1.46E-04            | 1.58        | up        |                          |
| 1428986_at   | <i>Slc17a7</i>       | chr7  | 4.93E-03            | 1.24        | up        | 4.87E-03            | 1.30        | up        |                          |
| 1452742_at   | <i>Trak1</i>         | chr9  | 7.85E-03            | 1.44        | up        | 1.18E-03            | 1.54        | up        |                          |
| 1437118_at   | <i>Usp7</i>          | chr16 | 8.74E-03            | 2.79        | up        | 5.35E-03            | 2.59        | up        |                          |
| 1427254_at   | <i>Zfp445</i>        | chr9  | 9.66E-03            | 1.25        | up        | 9.80E-03            | 1.32        | up        |                          |

Supplementary Table 3. Probe Set List that overlap a miRBase miRNA-containing primary transcript

| Probe Set ID | PFC                  |             |           | HPC                  |             |           | Gene Symbol          |
|--------------|----------------------|-------------|-----------|----------------------|-------------|-----------|----------------------|
|              | FDR <i>P</i> - value | Fold Change | Direction | FDR <i>P</i> - value | Fold Change | Direction |                      |
| 1416568_a_at | 4.74E-03             | 1.54        | up        | 9.32E-02             | 1.39        | up        | <i>Acin1</i>         |
| 1423160_at   | 5.46E-03             | 1.29        | up        | 3.96E-01             | 1.08        | up        | <i>Spred1</i>        |
| 1423162_s_at | 8.96E-04             | 1.93        | up        | 8.70E-02             | 1.55        | up        | <i>Spred1</i>        |
| 1427410_at   | 1.07E-02             | 1.52        | up        | 5.22E-04             | 1.82        | up        | <i>Dleu2</i>         |
| 1427411_s_at | 6.60E-03             | 1.54        | up        | 6.48E-02             | 1.38        | up        | <i>Dleu2</i>         |
| 1427437_at   | 8.00E-03             | 1.54        | up        | 3.18E-01             | 1.11        | up        | <i>2610203C20Rik</i> |
| 1428562_at   | 3.56E-07             | 1.43        | up        | 2.47E-03             | 1.39        | up        | <i>2210403K04Rik</i> |
| 1428764_at   | 2.12E-04             | 1.45        | up        | 3.16E-01             | 1.39        | up        | <i>Gtl2</i>          |
| 1428765_at   | 5.46E-03             | 1.11        | up        | 2.65E-01             | 1.14        | up        | <i>Gtl2</i>          |
| 1434730_at   | 2.07E-07             | 1.38        | up        | 2.34E-01             | 1.13        | up        | <i>A1854517</i>      |
| 1435089_at   | 1.41E-05             | 1.87        | up        | 3.53E-05             | 1.67        | up        | <i>2010111I01Rik</i> |
| 1435179_at   | 2.40E-06             | 1.47        | up        | 1.42E-05             | 1.50        | up        | <i>C130071C03Rik</i> |
| 1436746_at   | 6.60E-03             | 1.57        | up        | 3.96E-01             | 1.20        | up        | <i>Wnk1</i>          |
| 1439305_at   | 7.32E-05             | 1.95        | up        | 4.77E-02             | 1.40        | up        |                      |
| 1440097_at   | 3.39E-03             | 1.27        | up        | 2.30E-01             | 1.24        | up        | <i>Mirg</i>          |
| 1440357_at   | 2.24E-07             | 2.33        | up        | 1.06E-04             | 1.93        | up        |                      |
| 1445502_at   | 8.67E-03             | 1.52        | up        | 8.65E-02             | 1.30        | up        |                      |
| 1457030_at   | 3.63E-07             | 1.66        | up        | 1.45E-04             | 1.80        | up        | <i>Mirg</i>          |
| 1457336_at   | 4.71E-03             | 1.72        | up        | 3.33E-01             | 1.45        | up        | <i>R3hdm1</i>        |
| 1460033_at   | 2.24E-07             | 2.05        | up        | 3.22E-06             | 1.76        | up        | <i>C030002C11Rik</i> |
| 1460695_a_at | 6.06E-04             | 1.43        | up        | 2.22E-01             | 1.17        | up        | <i>2010111I01Rik</i> |

**Supplementary Table 4: miRNAs down-regulated in PFC and HPC of *Df(16)A*<sup>+/-</sup> mice**

| miRNA (mmu-miR) | Locus  | FDR P-value | Fold Change | Chr | Chr_start | Chr_end   | Strand | Note                                                              |
|-----------------|--------|-------------|-------------|-----|-----------|-----------|--------|-------------------------------------------------------------------|
| <b>PFC</b>      |        |             |             |     |           |           |        |                                                                   |
| 185             | 185    | 3.6E-08     | 0.42        | 16  | 18240964  | 18241028  | -      |                                                                   |
| 134             | 134    | 2.2E-04     | 0.62        | 12  | 110181946 | 110182016 | +      |                                                                   |
| 665             | 665    | 2.2E-04     | 0.64        | 12  | 110034121 | 110034214 | +      |                                                                   |
| 674             | 674    | 2.2E-04     | 0.65        | 2   | 116876568 | 116876667 | +      |                                                                   |
| 532             | 532    | 3.3E-04     | 0.66        | X   | 6405361   | 6405456   | -      |                                                                   |
| 673             | 673    | 6.6E-04     | 0.55        | 12  | 110019797 | 110019887 | +      |                                                                   |
| 674*            | 674*   | 1.3E-03     | 0.68        | 2   | 116876568 | 116876667 | +      |                                                                   |
| 224             | 224    | 1.4E-03     | 0.27        | X   | 68513751  | 68513832  | -      |                                                                   |
| 491             | 491    | 1.4E-03     | 0.60        | 4   | 87593271  | 87593356  | +      |                                                                   |
| 744             | 744    | 1.4E-03     | 0.77        | 11  | 65550928  | 65551027  | -      |                                                                   |
| 377             | 377    | 1.4E-03     | 0.45        | 12  | 110188317 | 110188384 | +      |                                                                   |
| 93              | 93     | 1.5E-03     | 0.83        | 5   | 138395311 | 138395398 | -      |                                                                   |
| 383             | 383    | 1.7E-03     | 0.75        | 8   | 39720650  | 39720719  | -      |                                                                   |
| 212             | 212    | 1.8E-03     | 0.77        | 11  | 74989583  | 74989673  | +      |                                                                   |
| 22              | 22     | 2.0E-03     | 0.80        | 11  | 75279911  | 75280005  | +      |                                                                   |
| 378             | 378    | 3.0E-03     | 0.70        | 18  | 61523204  | 61523269  | -      |                                                                   |
| 422b            | 422b   | 3.1E-03     | 0.59        | 18  | 61523204  | 61523269  | -      | renamed mir-378                                                   |
| 425             | 425    | 3.5E-03     | 0.66        | 9   | 108426880 | 108426964 | +      |                                                                   |
| 700             | 700    | 3.5E-03     | 0.60        | 4   | 134688631 | 134688709 | -      |                                                                   |
| 299             | 299    | 4.0E-03     | 0.54        | 12  | 110158445 | 110158507 | +      |                                                                   |
| 324-5p          | 324-5p | 4.1E-03     | 0.76        | 11  | 69828238  | 69828326  | +      |                                                                   |
| 342             | 342    | 4.1E-03     | 0.80        | 12  | 109106427 | 109106525 | +      |                                                                   |
| 345             | 345    | 4.1E-03     | 0.71        | 12  | 109284780 | 109284875 | +      |                                                                   |
| 467*            | 467*   | 4.1E-03     | 0.79        | 2   | 10394199  | 10394271  | +      | low complexity repeat                                             |
| 540             | 540    | 4.1E-03     | 0.41        | 12  | 110033887 | 110033953 | +      |                                                                   |
| 708             | 708    | 4.1E-03     | 0.58        | 7   | 96124616  | 96124724  | +      |                                                                   |
| 770-3p          | 770-3p | 4.1E-03     | 0.73        | 12  | 110011499 | 110011592 | +      |                                                                   |
| 106b            | 106b   | 4.8E-03     | 0.80        | 5   | 138395525 | 138395606 | -      |                                                                   |
| 541             | 541    | 4.8E-03     | 0.77        | 12  | 110190216 | 110190305 | +      |                                                                   |
| 99b             | 99b    | 4.8E-03     | 0.81        | 17  | 17534806  | 17534875  | +      |                                                                   |
| 140*            | 140*   | 6.1E-03     | 0.59        | 8   | 110440373 | 110440442 | +      |                                                                   |
| 194             | 194-1  | 6.1E-03     | 0.74        | 1   | 187014107 | 187014173 | +      | two locations in mouse genome                                     |
| 194             | 194-2  |             |             | 19  | 6264643   | 6264728   | +      |                                                                   |
| 325             | 325    | 6.1E-03     | 0.66        | X   | 101581801 | 101581898 | -      |                                                                   |
| 494             | 494    | 6.1E-03     | 0.55        | 12  | 110163125 | 110163209 | +      |                                                                   |
| 362             | 362    | 7.5E-03     | 0.53        | X   | 6398941   | 6399005   | -      |                                                                   |
| 107             | 107    | 7.9E-03     | 0.81        | 19  | 34886684  | 34886770  | -      |                                                                   |
| 154             | 154    | 8.6E-03     | 0.83        | 12  | 110186240 | 110186305 | +      |                                                                   |
| 324-3p          | 324-3p | 9.9E-03     | 0.74        | 11  | 69828238  | 69828326  | +      |                                                                   |
| 350             | 350    | 9.9E-03     | 0.78        | 1   | 178609000 | 178609098 | -      |                                                                   |
| 338             | 338    | 1.3E-02     | 0.62        | 11  | 119830855 | 119830952 | -      |                                                                   |
| 676*            | 676*   | 1.4E-02     | 0.76        | X   | 96583816  | 96583904  | +      |                                                                   |
| 329             | 329    | 1.6E-02     | 0.80        | 12  | 110161288 | 110161384 | +      |                                                                   |
| 409             | 409    | 1.7E-02     | 0.78        | 12  | 110190965 | 110191043 | +      |                                                                   |
| 323             | 323    | 1.7E-02     | 0.77        | 12  | 110160315 | 110160400 | +      |                                                                   |
| 103             | 103-1  | 1.7E-02     | 0.82        | 11  | 35625819  | 35625904  | +      | two locations in mouse genome                                     |
| 103             | 103-2  |             |             | 2   | 130979493 | 130979578 | +      |                                                                   |
| 505             | 505    | 1.9E-02     | 0.52        | X   | 56741073  | 56741162  | -      |                                                                   |
| 133a            | 133a-1 | 2.1E-02     | 0.74        | 18  | 10782907  | 10782974  | -      | two locations in mouse genome                                     |
| 133a            | 133a-2 |             |             | 2   | 180327787 | 180327890 | +      |                                                                   |
|                 |        |             |             |     |           |           |        | low complexity repeat<br>mmu-mir-669a-1 at chr2:10394706-10394802 |
| 669a            | 669a   | 2.1E-02     | 0.67        | 2   | 10394706  | 10394802  | -      |                                                                   |
| 151             | 151    | 2.2E-02     | 0.78        | 15  | 73082071  | 73082138  | -      |                                                                   |

|         |        |         |      |    |           |           |   |                               |
|---------|--------|---------|------|----|-----------|-----------|---|-------------------------------|
| 125b    | 125b-1 | 2.6E-02 | 0.82 | 9  | 41332995  | 41333071  | + | two locations in mouse genome |
| 125b    | 125b-2 |         |      | 16 | 77528865  | 77528935  | + |                               |
| 455-3p  | 455-3p | 2.8E-02 | 0.76 | 4  | 62743212  | 62743293  |   |                               |
| 18      | 18     | 3.0E-02 | 0.70 | 14 | 113925688 | 113925783 | + |                               |
| 291b-5p | 291b   | 3.6E-02 | 0.68 |    | --        | --        |   | unknown location              |
| 100     | 100    | 4.6E-02 | 0.82 | 9  | 41282494  | 41282573  | + |                               |
| 412     | 412    | 4.6E-02 | 0.72 | 12 | 110191096 | 110191175 | + |                               |
| 192     | 192    | 4.7E-02 | 0.75 | 19 | 6264844   | 6264932   | + |                               |
| 337     | 337    | 4.7E-02 | 0.67 | 12 | 110033596 | 110033692 | + |                               |
| 122a    | 122a   | 4.8E-02 | 0.25 | 18 | 65374230  | 65374295  | + |                               |
| 186     | 186    | 4.8E-02 | 0.51 | 3  | 157479572 | 157479642 | + |                               |
| 25      | 25     | 4.8E-02 | 0.81 | 5  | 138395109 | 138395192 | - |                               |

## HPC

|      |       |         |      |    |           |           |   |                                                                 |
|------|-------|---------|------|----|-----------|-----------|---|-----------------------------------------------------------------|
| 185  | 185   | 6.5E-12 | 0.41 | 16 | 18240964  | 18241028  | - | renamed mir-37 8                                                |
| 422b | 422b  | 4.8E-06 | 0.54 | 18 | 61523204  | 61523269  | - |                                                                 |
| 674  | 674   | 1.0E-05 | 0.75 | 2  | 116876568 | 116876667 | + |                                                                 |
| 673  | 673   | 1.3E-05 | 0.64 | 12 | 110019797 | 110019887 | + |                                                                 |
| 674* | 674*  | 1.4E-05 | 0.69 | 2  | 116876568 | 116876667 | + |                                                                 |
| 409  | 409   | 3.2E-05 | 0.78 | 12 | 110190965 | 110191043 | + |                                                                 |
| 151  | 151   | 4.5E-05 | 0.78 | 15 | 73082071  | 73082138  | - |                                                                 |
| 540  | 540   | 1.0E-04 | 0.53 | 12 | 110824290 | 110824356 | + |                                                                 |
| 212  | 212   | 1.2E-04 | 0.73 | 11 | 74989583  | 74989673  | + |                                                                 |
| 532  | 532   | 2.7E-04 | 0.61 | X  | 6405361   | 6405456   | - |                                                                 |
| 140* | 140*  | 4.2E-04 | 0.67 | 8  | 110440373 | 110440442 | + |                                                                 |
| 494  | 494   | 5.1E-04 | 0.58 | 12 | 110163125 | 110163209 | + |                                                                 |
| 491  | 491   | 1.4E-03 | 0.69 | 4  | 87593271  | 87593356  | + |                                                                 |
| 224  | 224   | 1.4E-03 | 0.29 | X  | 68513751  | 68513832  | - |                                                                 |
| 325  | 325   | 1.8E-03 | 0.73 | X  | 101581801 | 101581898 | - |                                                                 |
| 134  | 134   | 2.5E-03 | 0.57 | 12 | 110181946 | 110182016 | + |                                                                 |
| 153  | 153   | 2.7E-03 | 0.71 | 12 | 117692826 | 117692894 | + | two locations in mouse genome                                   |
| 153  |       |         |      |    |           |           |   |                                                                 |
| 93   | 93    | 2.9E-03 | 0.73 | 5  | 138395311 | 138395398 | - |                                                                 |
| 200a | 200a  | 3.4E-03 | 0.54 | 4  | 155429005 | 155429094 | - |                                                                 |
| 29c  | 29c   | 3.5E-03 | 0.72 | 1  | 196738271 | 196738358 | + |                                                                 |
| 323  | 323   | 3.5E-03 | 0.81 | 12 | 110160315 | 110160400 | + |                                                                 |
| 379  | 379   | 4.0E-03 | 0.78 | 12 | 110947270 | 110947335 | + |                                                                 |
| 106b | 106b  | 4.0E-03 | 0.73 | 5  | 138395525 | 138395606 | - |                                                                 |
| 18   | 18    | 4.4E-03 | 0.64 | 14 | 113925688 | 113925783 | + |                                                                 |
| 362  | 362   | 4.9E-03 | 0.67 | X  | 6398941   | 6399005   | - |                                                                 |
| 194  | 194-1 | 5.5E-03 | 0.74 | 1  | 187014107 | 187014173 | + | two locations in mouse genome                                   |
| 194  | 194-2 |         |      | 19 | 6264643   | 6264728   | + |                                                                 |
| 383  | 383   | 6.9E-03 | 0.75 | 8  | 39720650  | 39720719  | - |                                                                 |
| 29a  | 29a   | 7.2E-03 | 0.74 | 6  | 30992823  | 30992910  | - |                                                                 |
| 669a | 669a  | 1.1E-02 | 0.75 | 2  | 10394706  | 10394802  | + | low complexity repeat, mmu-mir-669a-1 at chr2:10394706-10394802 |
| 708  | 708   | 1.2E-02 | 0.67 | 7  | 96124616  | 96124724  | + |                                                                 |

**Supplementary Table 5. Primers and probes used in qRT-PCR**

| <b>Name</b>               | <b>Sequence</b>                |
|---------------------------|--------------------------------|
| <i>Dgcr8</i> -exon6-8-L   | AATGGGAAGTCTGAGTTTGC           |
| <i>Dgcr8</i> -exon6-8-P   | ACATGCAGCGTGTCTCAAGGTC         |
| <i>Dgcr8</i> -exon6-8-R-2 | AGTTCCAGATCCGTAAGTCACAC        |
| <i>Dgcr8</i> -exon8-9-L   | GGAGAAGCCTAAAGACAGTGAA         |
| <i>Dgcr8</i> -exon8-9-P   | TAACCACATCAGTATTGAGGATTCA      |
| <i>Dgcr8</i> -exon8-9-R   | GGAGACAACAGCCCAGCCT            |
| <i>Dgcr8</i> -F           | CCACGACCATCCTCAGACATTG         |
| <i>Dgcr8</i> -R           | ATGAAAATCTCCCCTCCCACAGCC       |
| Gene trap-R               | ACGCCATACAGTCCTCTTCAC          |
| <i>Mirg</i> -L            | GACATTCCACTGGGGACATC           |
| <i>Mirg</i> -P            | CCTGAGCCCTGACCTGAAGCC          |
| <i>Mirg</i> -R            | GGAGGCCACAAAGTCAGGTA           |
| Pri-134_L1                | CTTGGTGAGGCAGCTGTG             |
| Pri-134_P1                | TGGCACCAACATCTCTCCGGA          |
| Pri-134_R1                | AACCAGTCACACACCCTGAA           |
| Pri-154_L1                | AGGTTATCCGTGTTGCCTTC           |
| Pri-154_P1                | CCAAATCCCGCCTTGGAGGA           |
| Pri-154_R1                | CTGGAAAGACGCTAACACCA           |
| Pri-186-L1                | TCAGACTGTGGAGTCTTGTTG          |
| Pri-186-P1                | 6CAGTCCTACAGTTCCAGAGGGCC[3BQ1] |
| Pri-186-R1                | AAGGAGAATTCTTTGGAAAGTTG        |
| Pri-26a-1-F               | GCAGAACTCCAGAGAGAAGGAAGGTA     |
| Pri-26a-1-P               | AAGCTGGAGGACCGAGGC             |
| Pri-26a-1-R               | GACCTGCACAGCCTATCCTGGAT        |
| Pri-29b_L1                | GGTTTCACATGGTGGCTTAG           |
| Pri-29b_P1                | TGTAGTCTACCCTCTGCTGTGCTGCA     |
| Pri-29b_R1                | CTCGAAGGAGAGAGCCAGTT           |
| Pri-29C_L1                | CCAGTCGGTCCATCTCTTACA          |
| Pri-29C_P1                | CAGGCTGACCGATTTCTCCTGG         |
| Pri-29C_R1                | GTGCTCTTCCCCCTACATCAT          |
| Pri-30d-F                 | CAGCATCCTCAGCTCCAATCCTT        |
| Pri-30d-P                 | CCAGATTGTCCAAAAGAT             |
| Pri-30d-R                 | TGTAAGCCACAGCCAAGCTTTCA        |
| Pri-330-L1                | TTGTTGCTGTTGCCTAGGAG           |
| Pri-330-P1                | 6CCGGTCTTCCAGGATCGCGT[3BQ1]    |
| Pri-330-R1                | CTTTGCTCGTTGGATCTTGA           |
| Pri-382-F                 | TGGAAACCATAGCCCTTGGAGAA        |
| Pri-382-P                 | CCCTTTGTCTGTCTTGTCTC           |
| Pri-382-R                 | AAGCGAATCCACCACGAACAAC         |
| Pri-410-F                 | CAGGACAGCTTCAGGTGGTGATT        |
| Pri-410-P                 | CAGCTCCAGGGTTGC                |
| Pri-410-R                 | CGTCATTAATAAAGCGAACTCATCACA    |
| Pri-488-L1                | ACTTCAGCAGGAAGAATGCC           |
| Pri-488-P1                | 6TCCCAGCTGGAGCTTCCTCCA[3BQ1]   |
| Pri-488-R1                | CAGCCTTTCAAACAACATGG           |
| Pri-671-L1                | AGCAGAGGGCTGCTTCTACA           |
| Pri-671-P1                | 6AGGAGGAAGCCCTGGAGGGG[3BQ1]    |

|                  |                                  |
|------------------|----------------------------------|
| Pri-671-R1       | CTGAGAACCGGAGGAAAACA             |
| Pri-9_L1         | ATCTGGAGTTCAGCCAGAGG             |
| Pri-9_P1         | TCGCTTCCCTCACAAGGCTGC            |
| Pri-9_R1         | CGGTGACCTTGAAGGAGTTT             |
| Pri-92-1-F       | AAAAGTCTGTAGAGAAGTAAGGGAAAATCAAA |
| Pri-92-1-P       | CCCTTTCTACACAGGTTGGG             |
| Pri-92-1-R       | CCGGGACAAGTGCAATACCATAC          |
| Pri-98-F         | GGTAGGGATTTTAGGCCCCAGTAA         |
| Pri-98-P         | AGATAACTATACAACTTACTACTTTCCTTG   |
| Pri-98-R         | AATGGAGTCAATACTGCCAAGACTTAATG    |
| <i>Drosha</i> -F | GGATAGGCTGTGGGAAAGGA             |
| <i>Drosha</i> -R | CTTCTTGATGTCTTCAGCCTCC           |
| <i>Drosha</i> -P | AGAAGCGGTTTCATTGAGCGGAAA         |
| <i>Dicer1</i> -F | TGCTCGAGATGGAACCAGA              |
| <i>Dicer1</i> -R | TCAGCTGTTAGGAACCTGAGGC           |
| <i>Dicer1</i> -P | TACAGGATCGCCAAGTCTGCTGC          |



## SUPPLEMENTARY NOTE

**Production of mice with a deficiency at the orthologous 22q11.2 locus.** By using a chromosomal engineering approach<sup>1</sup>, we generated a mouse model carrying a 1.3-Mb deficiency on chromosome 16 syntenic to the human 22q11.2 region ranging from the *Dgcr2* gene to the *Hira* gene and encompassing 27 genes (*Df(16)A*<sup>+/-</sup>, **Suppl. Fig. 1A**). Targeting constructs for the 5' and 3' ends of the deficiency were introduced into *HPRT*-deficient AB2.2 ES cells through homologous recombination (**Suppl. Fig. 1B**). Exposure to Cre recombinase *in vitro*, followed by selection in hypoxanthine-aminopterin-thymidine (HAT) media, led to the generation of ES cells with the expected deficiency. Chimeric mice were generated and germline transmission of the deficiency was achieved and confirmed by Southern blot and PCR analysis (**Suppl. Fig. 1C**). Fluorescent in situ hybridization (FISH) analysis of mice following two or three generations of backcrossing demonstrated that the deficiency was present and stable through at least 3 backcross generations (**Suppl. Fig. 1D**). Mice harboring the deficiency appeared normal by gross observation, although, consistent with previous results<sup>2</sup> we obtained fewer *Df(16)A*<sup>+/-</sup> adult mice (37.3%,  $n = 300$ ) than the 50% transmission rate expected from heterozygote (HET) X wild-type (WT) crosses. A fraction of HET mice were found previously to die at birth or shortly thereafter, apparently from a number of cardiovascular abnormalities, which have been characterized at E18.5 and E13.5<sup>2,3</sup>. Milder forms of cardiac abnormalities were found to persist in 18% of surviving adult mice<sup>2</sup>. *Df(16)A*<sup>+/-</sup> mice do not show any gross anatomical brain abnormalities, but show deficits in synaptic connectivity in the HPC, which can be partially accounted for by deficiency in the *Zdhhc8*<sup>4</sup> gene (Mukai et al., submitted).

**Pavlovian fear conditioning.** Our results are consistent with the study of Paylor et al.<sup>5</sup> that also showed deficits in contextual learning in a mouse strain carrying a smaller deficiency. Since the Paylor et al. study did not identify a deficit in the cued conditioning test, we re-examined this task and reproduced our findings in a second cohort of male mice (see **Suppl. Fig. 2A**).

**Comparison with previous expression profiling studies at this locus.** There are 2 independent studies<sup>6,7</sup> that have used expression profiling in mouse models of this locus. We provide below a comparison between these studies and the present. The first study, Sivagnanasundaram et al.<sup>6</sup>, used a mouse strain (*Dfl*<sup>+/-</sup>) that carries a smaller chromosomal deficiency (*Dfl*), which is not found in humans and does not include five genes that are deleted in the mouse strain used in the present study. They also used Affymetric GeneChip (MOE430A), which includes approximately 22K probe sets for only known genes, while the present study used MOE430 2.0, which includes 45K probe sets (all genes on both MOE430A and MOE430B). MOE430B includes approximately 23K ESTs and therefore our analysis has higher chance to identify transcripts that are not related to known genes (including many of the ones shown to contain miRNA genes). They also used only 3 mutant and 3 WT mice, and therefore their study lacks power as compared to our study, which used 10 pairs of animals. These authors employed a Per chip positive control and per gene median normalization method. By contrast, we used the well-established GC-RMA method for data normalization, which controls for both within and between chip variation. In addition, they used an arbitrary cutoff *P*-value to control for multiple testing, whereas we employed the widely used False Discovery Rate

(FDR) Method. Notably, Sivagnanasundaram et al.<sup>6</sup> failed to detect the expected reduction in all of the genes included within the chromosomal deficiency. By contrast, in our study, all the genes within the 22q11 deficiency were found to be reduced by ~50%, consistent with the Jurata et al.<sup>7</sup> and Meechan et al.<sup>8</sup> studies. Despite all these differences we attempted to compare our results with those of Sivagnanasundaram et al.<sup>6</sup> To facilitate comparisons we used nominal *P*-values because Sivagnanasundaram et al.<sup>6</sup> do not report FDR-corrected *P*-values. When we consider the 27 differentially expressed probe sets reported by Sivagnanasundaram et al.<sup>6</sup> we find that approximately 1/3 of these probe sets show nominally significant *P*-values and similar trend of fold-change in our dataset (data not shown). However, all these probe sets are removed after we apply FDR correction.

The second study, Jurata et al.<sup>7</sup>, also used mice carrying the smaller Df1 deficiency, as well as a different expression platform (Agilent Mouse Oligo Array 22K, containing about 20,371 genes: 16,359 known genes, 4,509 genes with no Refseq names). They focused on one HPC structure (dentate gyrus), which they isolated via laser-capture microdissection and therefore had to conduct an RNA amplification step. Although they use a comparable to ours set of animal pairs ( $n = 12$ ), they conduct a LOWESS normalization for each chip, but no correction between chips. They also do not apply any multiple testing correction for their significant *P*-values. As a result, they report a high false positive rate in their results. For these reasons, direct comparison of our results and those of Jurata et al.<sup>7</sup> is difficult. Nevertheless, it is worth noting that one of the most (nominally) significant expression differences they report is for EST (AI854517), which is part of EST AK032343, which contains mir-9-3. Consistent with our findings, the

Jurata et al.<sup>7</sup> study reported an up-regulation of 1.2-fold for this miRNA-containing transcript.

**PFC/HPC shared gene list.** Inspection of the PFC/HPC shared gene list (**Suppl. Table 2**) revealed several known genes, such as *B3gat1* (previously associated with a schizophrenia-like psychosis through molecular analysis of a balanced translocation<sup>9</sup>), *Bsn* and *Slc17a7/vGlut1* (both important components of glutamatergic synapses), as well as *Cdk5r* (the regulatory subunit of cyclin-dependent kinase 5, the major kinase that opposes the phosphatase activity of calcineurin, which has been previously implicated in schizophrenia<sup>10</sup>). The PFC/HPC shared gene list also included the *Mirg* gene, a non-coding RNA gene, which is highly expressed in the adult brain and contains the largest miRNA cluster in the mouse genome<sup>11,12</sup>. Probe sets from the *Mirg* gene indicated transcript up-regulation, a finding confirmed with quantitative RT-PCR (qRT-PCR) using primers from the 3' end of the gene (see **Fig. 3A, B**, main manuscript). The contribution of these genes to the 22q11-associated psychiatric and cognitive deficits is the focus of ongoing investigation (BX, JAG, MK, unpublished data).

**Production of *Dgcr8*-deficient mice** (see **Fig. 4**, main manuscript). We generated *Dgcr8*-deficient mice using an ES cell line (XH157 ES, BayGenomics) carrying a  $\beta$ -geo gene trap inserted into intron 8 of the *Dgcr8* gene (**Fig. 4A, B**). A transcriptional fusion, expected to be generated as a result of splicing between the splice donor site at *Dgcr8* exon 8 and the splice acceptor site located at the gene trap (expected size ~7.5-kb), was detected in Northern blots using mRNA extracted from total brain of HET mice (**Fig.**

**4C).** As expected, by using qRT-PCR we showed that the full-length *Dgcr8* mRNA levels are reduced by approximately half in *Dgcr8*-deficient mice ( $P = 0.0001$ ) (**Fig. 4D**). At the protein level, we can also readily detect by Western blots, using total brain protein extracts, a chimeric protein produced as a result of the translational fusion between the N-terminal part of *Dgcr8* and the  $\beta$ -geo moiety (expected size ~220-kD) and the reduced WT 120-kD product (**Fig. 4E**). As a result of the translational fusion, one of the two functional double-stranded RNA binding domains of *Dgcr8* is truncated, whereas the second one is completely eliminated in this chimeric protein which is, therefore, predicted to have severely impaired activity. Consistent with this prediction, homozygous mice die before birth (unpublished data).

**Normal hearing of *Dgcr8*-deficient mice.** To control against confounding effects of impaired hearing, we examined the response of *Dgcr8*<sup>+/-</sup> mice to startle stimuli, ranging from background (70 dB) to 118 dB. At each of the lowest intensities used in the PPI protocol (74 – 86 dB) there were no significant differences in startle between genotypes ( $P > 0.05$ , see **Suppl. Fig. 2B**). Also, within-genotype comparisons to the background level (70 dB) revealed that *Dgcr8*<sup>+/-</sup> mice first show significant ( $P < 0.05$ ) startle response over background at 90 dB, whereas WT mice first show significant response at 94 dB.

## REFERENCES

1. Zheng, B., Mills, A.A. & Bradley, A. A system for rapid generation of coat color-tagged knockouts and defined chromosomal rearrangements in mice. *Nucleic Acids Research* **27**, 2354-60 (1999).
2. Lindsay, E.A. et al. Congenital heart disease in mice deficient for the DiGeorge syndrome region.[see comment]. *Nature* **401**, 379-83 (1999).
3. Merscher, S. et al. TBX1 is responsible for cardiovascular defects in velo-cardio-facial/DiGeorge syndrome. *Cell* **104**, 619-29 (2001).
4. Mukai, J. et al. Evidence that the gene encoding ZDHHC8 contributes to the risk of schizophrenia.[see comment]. *Nature Genetics* **36**, 725-31 (2004).
5. Paylor, R. et al. Mice deleted for the DiGeorge/velocardiofacial syndrome region show abnormal sensorimotor gating and learning and memory impairments. *Human Molecular Genetics* **10**, 2645-50 (2001).
6. Sivagnanasundaram, S. et al. Differential gene expression in the hippocampus of the Df1/+ mice: a model for 22q11.2 deletion syndrome and schizophrenia. *Brain Research* **1139**, 48-59 (2007).
7. Jurata, L.W. et al. Altered expression of hippocampal dentate granule neuron genes in a mouse model of human 22q11 deletion syndrome. *Schizophrenia Research* **88**, 251-9 (2006).
8. Meechan, D.W. et al. Gene dosage in the developing and adult brain in a mouse model of 22q11 deletion syndrome. *Molecular Cellular Neuroscience* **33**, 412-28 (2006).
9. Jeffries, A.R. et al. beta-1,3-Glucuronyltransferase-1 gene implicated as a candidate for a schizophrenia-like psychosis through molecular analysis of a balanced translocation. *Molecular Psychiatry* **8**, 654-63 (2003).
10. Gerber, D.J. et al. Evidence for association of schizophrenia with genetic variation in the 8p21.3 gene, PPP3CC, encoding the calcineurin gamma subunit. *Proceedings of the National Academy of Sciences of the United States of America* **100**, 8993-8 (2003).
11. Seitz, H. et al. A large imprinted microRNA gene cluster at the mouse Dlk1-Gtl2 domain. *Genome Research* **14**, 1741-8 (2004).
12. Kosik, K.S. The neuronal microRNA system. *Nature Reviews Neuroscience* **7**, 911-20 (2006).

## SUPPLEMENTARY METHODS

**Gene targeting and generation of *Df(16)A*<sup>+/-</sup> mice.** Two mouse genomic libraries were used: the 5' *HPRT* library and the 3' *HPRT* library. The 5' *HPRT* vector backbone contains a *LoxP* site, exons 1 and 2 of the *HPRT* minigene, a coat color marker (tyrosinase minigene), and a neomycin resistance selection marker. The 3' *HPRT* vector backbone contains a *LoxP* site, exons 3 to 9 of the *HPRT* minigene, a coat color marker (K14 agouti transgene), and a puromycin resistance selection marker. The 5' *HPRT* library was screened for *Dgcr2* and the 3' *HPRT* library was screened for *Hira*. Both 5' and 3' constructs were obtained, linearized within the genomic inserts (using *NheI* for the 5' construct and *NdeI* for the 3' construct), and electroporated into ES cells. After introduction of the 5' vector (25 µg of DNA was used), the clones were selected in 180 µg/ml of G418 for 8 – 10 days. The 3' vector was then introduced (25 µg of DNA was used) and the clones were selected in 3 µg/ml of Puromycin for 8 – 10 days. To confirm the proper insertion of the 5' and 3' targeting constructs, we used a combination of Southern blot and PCR-based analyses. The ES cells used were the AB2.2 ES cell line, which is derived from *HPRT*-deficient 129S5/SvEvBrd mice<sup>1</sup>.

In order to achieve recombination between the *loxP* sites, we used 2 approaches. In the first approach, we electroporated a Cre recombinase-expressing construct (pOG231)<sup>2</sup> into doubly-targeted clones at the ES cell stage. Selection of the re-arranged chromosomes was possible in HAT media, since a functional *HPRT* minigene was produced when the two halves of the *HPRT* minigene were fused during the rearrangement. Doubly targeted clones were electroporated with the pOG231 Cre plasmid. Clones were selected in HAT (0.1 mM sodium hypoxanthine, 0.2 µM

aminopterin, and 0.016 mM thymidine) for 8 – 10 days and released in HT (0.1 mM sodium hypoxanthine and 0.016 mM thymidine) for 48 h.

Following Cre-mediated recombination, ES clones were amplified and injected into C57BL/6J blastocysts. Resulting chimeric males were bred to C57BL/6J females in order to obtain F1 mice. Southern blot analysis on a *KpnI* digest of tail DNA was used to confirm the presence of the deficiency. A 24.8-kb band indicating an expected change in the location of *KpnI* sites when the deletion was achieved, and an expected 7.4-kb WT band were detected. Once these mouse lines were confirmed by Southern blot analysis, maintenance was performed by PCR genotyping. Primers were selected such that an 829-bp band could be detected when the 5' and 3' insertions were directly abutted upon recombination. Primer 1 is within the 5' construct, inside human *HPRT* exon 2: 5'-ATTCCCCATGGACTAATTATGGACAGG-3'. Primer 2 is inside the 3' construct, within human *HPRT* intron 2: 5'-GGTATCTCCATAAGACAGAATGCTATGC-3'. The PCR cycling conditions we used were: 94°C for 3 min; 35 cycles of 94°C for 30 s, 60°C for 1 min, and 72°C for 1 min; 72°C for 10 min. A second set of primers: 5'-CTAGGCCACAGAATTGAAAGATCT-3' and 5'-GTAGGTGGAAATTCTAGCATCATCC-3' was included in these assays in order to detect a 324-bp *IL-2* internal control band.

In the second approach, we generated mice using ES clones containing non-recombined 5' and 3' *loxP* sites. For these lines, probes external to the 5' *Dgcr2* insert and external to the 3' *Hira* insert were used to verify the 5' and 3' insertions. In each case, mouse genomic DNA was prepared from tail clips of HET mice and digested with *SpeI*. Southern blot analysis detected a 20.6-kb band, demonstrating the proper positioning of the 5' insertion, in addition to a 15.6-kb WT band. For the 3' insert,



probing of *SpeI* cut DNA revealed a 14.5-kb band indicating the proper positioning of the 3' construct, in addition to an expected 17.7-kb WT band. Once these mouse lines were confirmed by Southern blot analysis, maintenance was performed by PCR genotyping. PCR primers were used to detect the puromycin resistance gene. 5'-ATGACCGAGTACAAGCCCAC-3' and 5'-GCGTGAGGAAGAGTTCTTGC-3' primers led to the generation of a 166-bp PCR product. The PCR cycling conditions we used were: 94°C for 3 min; 35 cycles of 94°C for 30 s, 65°C for 30 s, and 72°C for 90 s; then 72°C for 10 min. These mice were bred with mice expressing Cre recombinase in their germline: *HPRT-Cre* (stock # 004302), *Prm-Cre* (stock # 003328) and *Zp3-Cre* (stock # 003651), all obtained from The Jackson Laboratory, Bar Harbor, ME. Offspring that were positive by PCR for both the puromycin resistance gene (see PCR conditions above) and *Cre recombinase* (using primers 5'-GCGGTCTGGCAGTAAAACTATC-3' and 5'-GTGAAACAGCATTGCTGTCACCTT-3', and cycling conditions 94°C for 3 min; 35 cycles of 94°C for 30 s, 51°C for 1 min, and 72°C for 1 min; then 72°C for 10 min) were bred with C57BL/6J WT mice. The resulting offspring from these crosses were screened for the presence of the deficiency (*Df(16)A*) by using the primers and PCR conditions described above. We found that only the crosses using the *HPRT-Cre* mice led to the production of deletion mice. For the experimental studies described in this paper, the mice used were those in which the deletion was generated by exposure to Cre recombinase at the ES cell stage. Behavioral assays were performed on mutant mice and their WT littermates following a three-generation backcross of the mutations into the C57BL/6J background.

**Fluorescent *In Situ* hybridization (FISH).** FISH was performed at the Molecular Cytogenetics Core Facility at the Memorial Sloan-Kettering Cancer Center in New York. Mouse chromosome 16 BAC clones from within the deletion region [BACs RP23-47O21 (obtained from BACPAC Resources) and RP23-55L18 (from Invitrogen)] and outside the deletion region [BACs RP23-290E4 and RP23-356A24, both purchased from Invitrogen] were differentially labeled and used as fluorescent probes. Metaphase chromosome spreads were prepared from splenocyte cultures obtained from 4 mice heterozygous for the deletion.

**Behavioral analysis:** *Open field activity assay.* Mouse activity was monitored in a clear illuminated acrylic chamber equipped with infrared sensors to automatically record horizontal and vertical activity (Colbourn Instruments). Each mouse was initially placed in the center of the chamber and its activity was recorded and collected in 1-min bins. The floors of the open field were cleaned with 70% ethanol between mice. Overall, 26 *Df(16)A<sup>+/-</sup>* mice and 22 WT controls of either sex were tested in the open field assays. For *Dgcr8<sup>+/-</sup>* testing, 9 male *Dgcr8<sup>+/-</sup>* mice and 9 male WT littermate controls were used. *Light/dark transition testing.* The open field activity box (Colbourn Instruments) was fitted with an acrylic insert that divided the box into a dark right half and a light left half, with a small doorway through which mice could pass. A lamp with a 60-W light bulb was positioned above the open field, thus providing extra illumination. Group-housed mice were removed from their home cages and placed into the dark side. Their activity was automatically recorded for 15 min. Twenty males (11 *Df(16)A<sup>+/-</sup>* mice, 9 WT littermate controls) and 15 females (8 *Df(16)A<sup>+/-</sup>* mice, 7 WT littermate controls) were tested.

*PPI analysis.* Acoustic startle and PPI of acoustic startle responses were recorded using two startle monitor chambers (Hamilton-Kinder). Trial types, trial type presentation, and background noise levels were performed according to the protocols described previously<sup>4</sup> with some modifications. For the *Df(16)A<sup>+/-</sup>* mice, both male (21 *Df(16)A<sup>+/-</sup>* and 19 WT littermate controls) and female mice were tested (10 *Df(16)A<sup>+/-</sup>* and 10 WT littermate controls). For the *Dgcr8<sup>+/-</sup>* mice, 10 male and 10 WT male littermate controls were used. Percent PPI was calculated as 100-[(startle response of acoustic startle from acoustic prepulse and startle stimulus trials/startle response alone trials) x 100]. A separate startle response curve session for the *Dgcr8<sup>+/-</sup>* mice included recordings made every 4 dBs above background (70 dB), up to 114 dB. *Cognitive tasks.* Both tasks were performed as described previously<sup>3,4</sup>. In both the Pavlovian fear conditioning and the spatial working memory test, 10 males (*Df(16)A<sup>+/-</sup>* or WT controls) and 10 females (*Df(16)A<sup>+/-</sup>* or WT controls), as well as 15 males (*Dgcr8<sup>+/-</sup>* or WT controls) were tested.

**Statistical analysis.** Statistical analysis was performed in STATVIEW (SAS Institute, Cary, NC). Data was analyzed by ANOVA or repeated-measures ANOVAs.

**RNA isolation for expression profiling.** We dissected a total of 20 PFC and 20 HPC from 10 *Df(16)A<sup>+/-</sup>* mutants and 10 WT control mice. All mice were male littermates 8 weeks of age. Tissues were processed using standard protocols recommended by Affymetrix. RNA quality was assessed with Bioanalyzer (Agilent Technologies, Palo Alto, CA). For hybridization, cRNA was fragmented and exposed to Affymetrix Mouse genome 430 2.0 array set chips (which include 45,000 probe sets from > 34,000 well characterized mouse genes). Sequence clusters were created and refined from UniGene

and the Whitehead Institute Center for Genome Research databases. After hybridization, microarrays were washed and scanned (Agilent).

**Gene class testing and pathway analysis.** We used two independent statistical approaches, ErmineJ<sup>5</sup> and gene-set-enrichment analysis (GSEA)<sup>6</sup>, which compare the number of genes in a class that show significant changes in expression with the number expected under a particular null hypothesis. After correction for multiple testing there was significant convergence between the two approaches, thus providing additional confidence in the findings. Normalized and log transformed raw data and FDR *P*-values of all probe sets were imported into gene class scoring analysis software ErmineJ and GSEA. Gene classes were defined using Gene Ontology (GO) terms, nested functional categories that summarize the known cellular components, molecular functions and biological processes. The GO database includes all known genes grouped into tree-like structure of the cellular components, biological processes or molecular functions. The significant GO terms branches were combined using Amigo (<http://www.godatabase.org/cgi-bin/amigo/go.cgi>) and visualized using Graphviz software (<http://www.graphviz.org/>). The significance levels were set to 0.05 in both ErmineJ and GSEA analyses.

Pathway analysis was performed using the PathwayAssist software (Version 3.0, Ariadne Genomic) as an interface to map our significant gene list (FDR *P*-value < 0.05 and fold change  $\geq 1.2$ ) onto ResNet, a comprehensive database of signaling pathways identified via literature mining. Specifically, the PathwayAssist software was used to further investigate if some of the significantly changed genes share the same biological

pathway or interact with each other as indicated by literature references. Significantly changed genes were imported into PathwayAssist and the ResNet Core database was used for the annotation. At FDR  $P$ -value  $< 0.05$  and fold change  $\geq 1.2$ , there were 375 differentially expressed probe sets in HPC. Of them, 132 probes matched known genes in the ResNet database.

**Quantitative RT-PCR of the miRNA pri-forms.** Total RNA from PFC and HPC was extracted from 8-wk old male mice using the same protocol as for the microarray study. We used 6 *Df(16)A*<sup>+/-</sup> mice and 6 WT littermate controls, as well as 6 *Dgcr8*<sup>+/-</sup> mice and 6 WT littermate controls. We used 5  $\mu$ g of RNA per sample for reverse transcription reactions. RNA was first subjected to DNAase digestion using the DNA-free kit (Ambion) and reverse-transcribed using Superscript II reverse transcriptase (Invitrogen) according to the company manuals. We pooled 3  $\mu$ l of the resulting cDNA from each sample as the template for the qRT-PCR standard curve. The rest of the cDNA was diluted 1:15 before preparing the qRT-PCR reaction. qRT-PCR was conducted using the ABI Taqman method. All PCR primers and Taqman probes were designed at two web sites (<https://www.genscript.com/ssl-bin/app/primer> and [http://frodo.wi.mit.edu/cgi-bin/primer3/primer3\\_www.cgi](http://frodo.wi.mit.edu/cgi-bin/primer3/primer3_www.cgi)) and purchased from Sigma Genosys (Sigma-Aldrich). All target gene probes were 5' FAM and 3' BHQ<sup>TM</sup>-1 Dual labeled. Mouse *glyceraldehyde-3-phosphate dehydrogenase (GAPDH)* mRNA was used as the endogenous control. The *GAPDH* gene probe was 5' JOE<sup>TM</sup> and 3' BHQ<sup>TM</sup>-1 dual labeled. For each sample, a duplex PCR reaction was set-up containing a target gene primer probe set and a *GAPDH* primer probe set. We conducted 5 replicate PCR reactions for each sample. The reactions were incubated in a 96-well plate at 95°C for 10 min, followed by 45 cycles of 95°C for

15 sec and 60°C for 1 min on a 7700 Sequence Detection System (Applied Biosystems). The relative levels of gene expression were determined according to the standard curve methods described in the ABI company manual (Applied Biosystems). The expression value of the target gene in each well was first normalized by the expression value of the *GAPDH* gene in the same well. The median of 5 repeated reactions was used to represent the relative quantity of the target gene. A student's *t*-test was conducted to identify the significant differences between the mutant mice and their corresponding WT littermate controls.

**Quantitative RT-PCR of the miRNA mature forms.** Total RNA samples of PFC were extracted from 8-wk old male mice using the mirVana™ miRNA Isolation Kit (Ambion) according to the manufacturer's protocol. We used 6 *Df(16)A<sup>+/-</sup>* mice and 6 WT littermate controls, as well as 6 *Dgcrδ<sup>+/-</sup>* mice and 6 WT littermate controls. Purified total RNA was eluted in 100 µl of elution buffer. We first treated 5 µg total RNA with DNA-free kit (Ambion). Then, 100 ng treated RNA was reverse transcribed and qRT-PCR was performed using the TaqMan® MicroRNA PCR kit and Mouse TaqMan® MicroRNA Assays according to the company's protocol (Applied Biosystems). A *GAPDH* gene-specific RT primer was included in the RT reaction and a duplex reaction that included target miRNA primer and probe set, as well as *GAPDH* primer and probe set was used in the subsequent qPCR reactions. The reactions were incubated in a 96-well plate at 95°C for 10 min, followed by 45 cycles of 95°C for 15 sec and 60°C for 1 min on a 7700 Sequence Detection System (Applied Biosystems). All reactions were repeated 5 times. The relative quantity was determined in the same way described in the previous section.

**Northern blot analysis.** The probe for *Dgcr8* was amplified using primers from exon 8 (5'-TGAAGGACAATGAGGAACGAG-3') and exon 9 (5'-CTCGAGTAATACGACTCACTATAGGAGGCTCACTTGGATTCTCACA-3') designed based on the *Dgcr8* full length cDNA sequence (GeneBank; NM\_033324). DIG-labeled RNA probe was then synthesized from the PCR product using the DIG Northern Starter Kit (Roche). Total RNA was extracted from mouse whole brain using Trizol reagent (Invitrogen) and mRNA was isolated using the PolyATtract® mRNA Isolation System III (Promega). 1 µg of mRNA per sample was resolved on a 1.2% denatured agarose gel and transferred to a Hybond-N+ nylon membrane (GE Healthcare). The blot was pre-hybridized in Easyhyb (Roche) at 68°C for 1 h. Hybridization was then performed at 68°C overnight. The wash and immunological detection steps were carried out according to the instructions of the DIG Northern Starter Kit (Roche).

**Western blot analysis.** Total brains were homogenized in lysis buffer containing 1% Triton X-100, 0.2 mM EDTA, 100 mM KCl and 20 mM Tris pH 8.0 and Proteinase inhibitor cocktail (Roche). Homogenates were centrifuged at 12,000 x g at 4°C for 30 min. The supernatant was saved and the protein concentration in each sample was determined. An aliquot of the supernatant equivalent to 15 – 20 µg protein was resolved on 8% SDS-PAGE and then transferred onto a nitrocellulose membrane (Schleicher and Schuell Bioscience, Inc). The membrane was first blocked by 5% nonfat dry milk in PBS buffer containing 0.5% Tween-20 for 1 h at room temperature. The membrane was then washed three times with the same buffer and treated with 1:400 diluted *Dgcr8* primary antibody (ProteinTech Group Inc). The membrane was washed again with the same buffer three times, treated with 1:5000 dilution of horseradish peroxidase conjugated

secondary antibody for 1 h at room temperature and then washed thoroughly. The washed membrane was incubated with HRP substrate (Western Lightning Chemiluminescence Reagent, PerkinElmer Life Sciences) for 1 min, exposed to Kodak X-Omat AR X-ray film (Eastman Kodak) and developed. The membrane was then stripped and re-probed with  $\alpha$ -actin antibody (Santa Cruz) as a loading control, using the same procedure described above.

**Nissl Staining.** Mice were perfused with 4% PFA and fixed overnight in 4% PFA at 4°C. Brains were then incubated in 30% sucrose overnight at 4°C and sectioned using a cryostat. Sections were collected, mounted on slides and dried overnight. Sections were then defatted in xylene for 30 min at room temperature twice, re-hydrated in 100% EtOH (3 min) followed by 95% EtOH (3 min) and stained in cresyl violet for 3 – 5 min. After rinsing in distilled water for 2 min, sections were then soaked in 95% EtOH for 5 min, dehydrated in 100% EtOH for 5 min, cleared in xylene for 5 min and then mounted on slides with Permount (Fisher Scientific). Images were taken with bright field microscope.



## REFERENCES

1. Matzuk, M.M., Finegold, M.J., Su, J.G., Hsueh, A.J. & Bradley, A. Alpha-inhibin is a tumour-suppressor gene with gonadal specificity in mice. *Nature* **360**, 313-9 (1992).
2. O'Gorman, S., Dagenais, N.A., Qian, M. & Marchuk, Y. Protamine-Cre recombinase transgenes efficiently recombine target sequences in the male germ line of mice, but not in embryonic stem cells. *Proceedings of the National Academy of Sciences of the United States of America* **94**, 14602-7 (1997).
3. Koike, H., Arguello, P.A., Kvajo, M., Karayiorgou, M. & Gogos, J.A. Disc1 is mutated in the 129S6/SvEv strain and modulates working memory in mice. *Proceedings of the National Academy of Sciences of the United States of America* **103**, 3693-7 (2006).
4. Paterlini, M. et al. Transcriptional and behavioral interaction between 22q11.2 orthologs modulates schizophrenia-related phenotypes in mice. *Nature Neuroscience* **8**, 1586-94 (2005).
5. Lee, H.K., Braynen, W., Keshav, K. & Pavlidis, P. ErmineJ: tool for functional analysis of gene expression data sets. *BMC Bioinformatics* **6**, 269 (2005).
6. Subramanian, A. et al. Gene set enrichment analysis: a knowledge-based approach for interpreting genome-wide expression profiles. [See comment]. *Proceedings of the National Academy of Sciences of the United States of America* **102**, 15545-50 (2005).
